# Supplementary material for: Encapsulation of TixFeyLamOz nanoparticles into NH2-MIL-125(Ti) to fabricate a promising photocatalyst for the C–N coupling reaction
Source: Royal Society of Chemistry journal article supplement (doi:10.1039/d3re00457k), 2024-01-01
Supplement: d3re00457k1.pdf [file d3re00457k1.pdf]

**Supporting information**

**Encapsulation of  $Ti_xFe_yLa_mO_z$  nanoparticle into  $NH_2$ -MIL-125(Ti) to fabricate a promising photocatalyst for C-N coupling reaction**

Yahya Absalan<sup>a\*</sup>, Mohammad Rafsanjani Dehghazi<sup>b</sup>, Reza Samavati<sup>c</sup>, Kambiz Sourid, and Mostafa Gholizadeh<sup>b</sup>

<sup>a</sup>Department of Chemistry, Georgia University, Athens, Georgia30602, United States

<sup>b</sup> Department of Chemistry, Faculty of Science, Ferdowsi University of Mashhad, Mashhad, Islamic Republic of Iran

<sup>c</sup>RUDN University, 6 Miklukho-Maklaya St., Moscow 117198, Russia

<sup>d</sup>Department of Mechanical and Instrumental Engineering, Academy of Engineering, RUDN University, 6 Miklukho-Maklaya Street, Moscow117198, Russia

## Supporting information

|                                                                                                                                                                                                                                                                                |    |
|--------------------------------------------------------------------------------------------------------------------------------------------------------------------------------------------------------------------------------------------------------------------------------|----|
| Figure S 1 The color of the different samples.....                                                                                                                                                                                                                             | 3  |
| Figure S 2 Photocatalytic C-N cross-coupling reaction .....                                                                                                                                                                                                                    | 4  |
| Figure S 3 PXRD pattern of (a) TixFeyOz, and (b) TixFeyLamOz.....                                                                                                                                                                                                              | 5  |
| Figure S 4 PXRD pattern of (a) pristine MOF, (b) La@MOF and (c) Fe@MOF .....                                                                                                                                                                                                   | 6  |
| Figure S 5 FT-IR spectroscopy of Fe@MOF.....                                                                                                                                                                                                                                   | 7  |
| Figure S 6 FESEM image of (a) TixFeyOz, (b) Fe@MOF.....                                                                                                                                                                                                                        | 7  |
| Figure S 7 EDX analysis of La(1)@MOF .....                                                                                                                                                                                                                                     | 8  |
| Figure S 8 EDX analysis of La(1.1)@MOF .....                                                                                                                                                                                                                                   | 8  |
| Figure S 9 EDX analysis of La(1.15)@MOF .....                                                                                                                                                                                                                                  | 9  |
| Figure S 10 Photocurrent transient response of TixFeyOz, and TixFeyLamOz nanoparticles under visible light irradiation .....                                                                                                                                                   | 10 |
| Figure S 11 (a) Diffuse reflectance spectra of TixFeyOz, and TixFeyLamOz nanoparticles; (b) UV-Vis Spectra of the TixFeyOz, and TixFeyLamOz nanoparticles; (c) the energy bandgap of the TixFeyOz, and TixFeyLamOz nanoparticles under the indirect transition assumption..... | 10 |
| Figure S 12 (a) CV analysis of TixFeyOz, nanoparticle and (b) TixFeyLamOz nanoparticle <sup>1</sup> .....                                                                                                                                                                      | 11 |
| Figure S 13 Mass Spectroscopy of 2,4-dinitro-N-phenylaniline.....                                                                                                                                                                                                              | 12 |
| Figure S 14 FT-IR spectra of 2,4-dinitro-N-phenylaniline.....                                                                                                                                                                                                                  | 12 |
| Figure S 15 H-NMR spectra of 2,4-dinitro-N-phenylaniline .....                                                                                                                                                                                                                 | 13 |
| Figure S 16 C-NMR spectra of 2,4-dinitro-N-phenylaniline .....                                                                                                                                                                                                                 | 14 |
| Figure S 17 Mass spectroscopy of N-(4-Bromophenyl)-2,4-dinitroaniline .....                                                                                                                                                                                                    | 15 |
| Figure S 18 FT-IR spectra of N-(4-Bromophenyl)-2,4-dinitroaniline .....                                                                                                                                                                                                        | 15 |
| Figure S 19 H-NMR spectra of N-(4-Bromophenyl)-2,4-dinitroaniline .....                                                                                                                                                                                                        | 16 |
| Figure S 20 C-NMR spectra of N-(4-Bromophenyl)-2,4-dinitroaniline.....                                                                                                                                                                                                         | 17 |
| Figure S 21 Mass Spectroscopy of N-(2-Bromophenyl)-2,4-dinitroaniline .....                                                                                                                                                                                                    | 18 |
| Figure S 22 FT-IR spectra of N-(2-Bromophenyl)-2,4-dinitroaniline .....                                                                                                                                                                                                        | 18 |
| Figure S 23 H-NMR spectra of N-(2-Bromophenyl)-2,4-dinitroaniline .....                                                                                                                                                                                                        | 19 |
| Figure S 24 C-NMR spectra of N-(2-Bromophenyl)-2,4-dinitroaniline.....                                                                                                                                                                                                         | 20 |
| Figure S 25 Mass spectroscopy of N-(3-Bromophenyl)-2,4-dinitroaniline .....                                                                                                                                                                                                    | 21 |
| Figure S 26 FT-IR Spectra of N-(3-Bromophenyl)-2,4-dinitroaniline.....                                                                                                                                                                                                         | 21 |
| Figure S 27 H-NMR spectra of N-(3-Bromophenyl)-2,4-dinitroaniline .....                                                                                                                                                                                                        | 22 |
| Figure S 28 C-NMR spectra of N-(3-Bromophenyl)-2,4-dinitroaniline.....                                                                                                                                                                                                         | 23 |
| Figure S 29 Mass Spectroscopy of N-(3,4-dimethylphenyl)-2,4-dinitroaniline.....                                                                                                                                                                                                | 24 |
| Figure S 30 FT-IR Spectra of N-(3,4-dimethylphenyl)-2,4-dinitroaniline.....                                                                                                                                                                                                    | 24 |
| Figure S 31 H-NMR Spectra of N-(3,4-dimethylphenyl)-2,4-dinitroaniline.....                                                                                                                                                                                                    | 25 |
| Figure S 32 C-NMR Spectra of N-(3,4-dimethylphenyl)-2,4-dinitroaniline .....                                                                                                                                                                                                   | 26 |
| Figure S 33 Mass spectroscopy of 2,4-dinitro-N-(p-tolyl).....                                                                                                                                                                                                                  | 27 |
| Figure S 34 FT-IR Spectroscopy of 2,4-dinitro-N-(p-tolyl).....                                                                                                                                                                                                                 | 27 |
| Figure S 35 H-NMR Spectra 2,4-dinitro-N-(p-tolyl).....                                                                                                                                                                                                                         | 28 |
| Figure S 36 C-NMR spectra of 2,4-dinitro-N-(p-tolyl) .....                                                                                                                                                                                                                     | 29 |
| Figure S 37 Mass Spectroscopy of N-(4-methoxyphenyl)-2,4-dinitroaniline .....                                                                                                                                                                                                  | 30 |
| Figure S 38 FT-IR Spectroscopy of N-(4-methoxyphenyl)-2,4-dinitroaniline .....                                                                                                                                                                                                 | 30 |
| Figure S 39 H-NMR Spectra of N-(4-methoxyphenyl)-2,4-dinitroaniline.....                                                                                                                                                                                                       | 31 |
| Figure S 40 C-NMR spectra of N-(4-methoxyphenyl)-2,4-dinitroaniline.....                                                                                                                                                                                                       | 32 |

## Supporting information

|                                                                                                   |       |
|---------------------------------------------------------------------------------------------------|-------|
| Figure S 41 Mass Spectroscopy of N-(4-chlorophenyl)-2,4-dinitroaniline .....                      | 33    |
| Figure S 42 FT-IR spectra of N-(4-chlorophenyl)-2,4-dinitroaniline .....                          | 33    |
| Figure S 43 H-NMR Spectra of N-(4-chlorophenyl)-2,4-dinitroaniline .....                          | 34    |
| Figure S 44 C-NMR Spectra of N-(4-chlorophenyl)-2,4-dinitroaniline .....                          | 35    |
| Figure S 45 Mass Spectroscopy of N-(3-chlorophenyl)-2,4-dinitroaniline .....                      | 36    |
| Figure S 46 FT-IR Spectra of N-(3-chlorophenyl)-2,4-dinitroaniline.....                           | 36    |
| Figure S 47 H-NMR Spectra of N-(3-chlorophenyl)-2,4-dinitroaniline .....                          | 37    |
| Figure S 48 C-NMR Spectra of N-(3-chlorophenyl)-2,4-dinitroaniline .....                          | 38    |
| <br>Table S 1 The data for La@MOF with different loadings of $Ti_xFe_yLa_mO_z$ nanoparticle ..... | <br>3 |
| Table S 2 Chemical-Physical Features of the Samples .....                                         | 5     |

Table S 1 The data for La@MOF with different loadings of  $Ti_xFe_yLa_mO_z$  nanoparticle

| Catalyst     | Titanium butoxide<br>( $\mu\text{mol}$ ) | 2-amino terephthalic acid<br>(mL) | Nanoparticle<br>( $\mu\text{mol}$ ) |
|--------------|------------------------------------------|-----------------------------------|-------------------------------------|
| La(1)@MOF    | 10                                       | 15.8                              | 10                                  |
| La(1.05)@MOF | 10                                       | 15.8                              | 10.5                                |
| La(1.1)@MOF  | 10                                       | 15.8                              | 11                                  |
| La(1.15)@MOF | 10                                       | 15.8                              | 11.5                                |

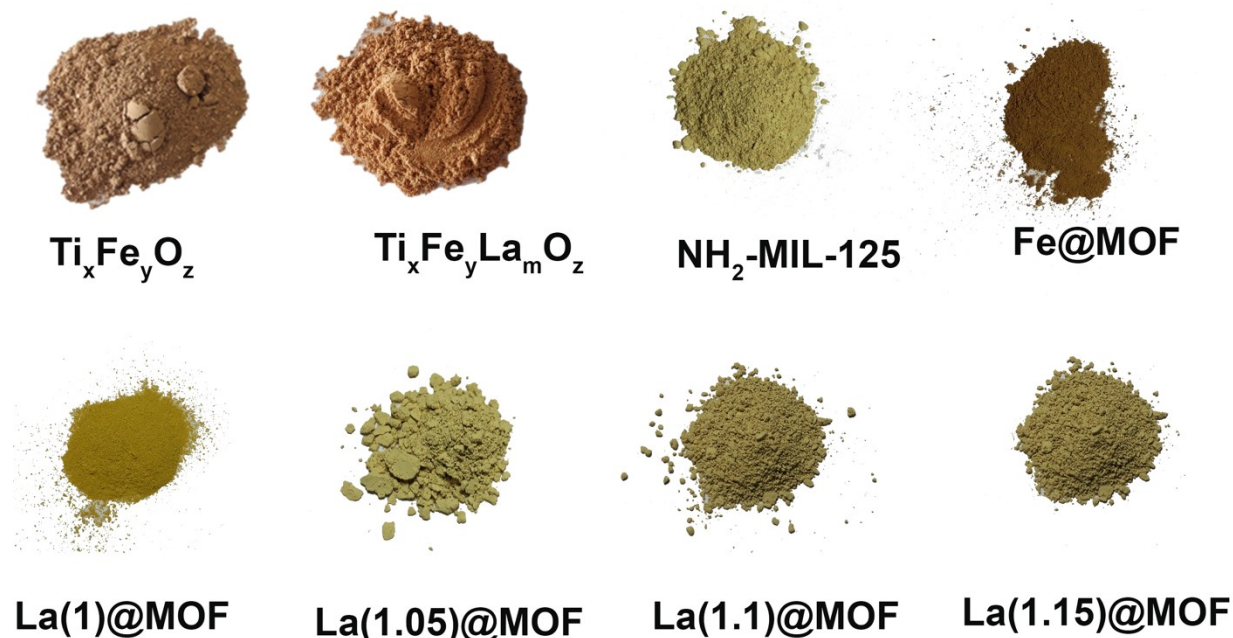

Figure S 1 The color of the different samples

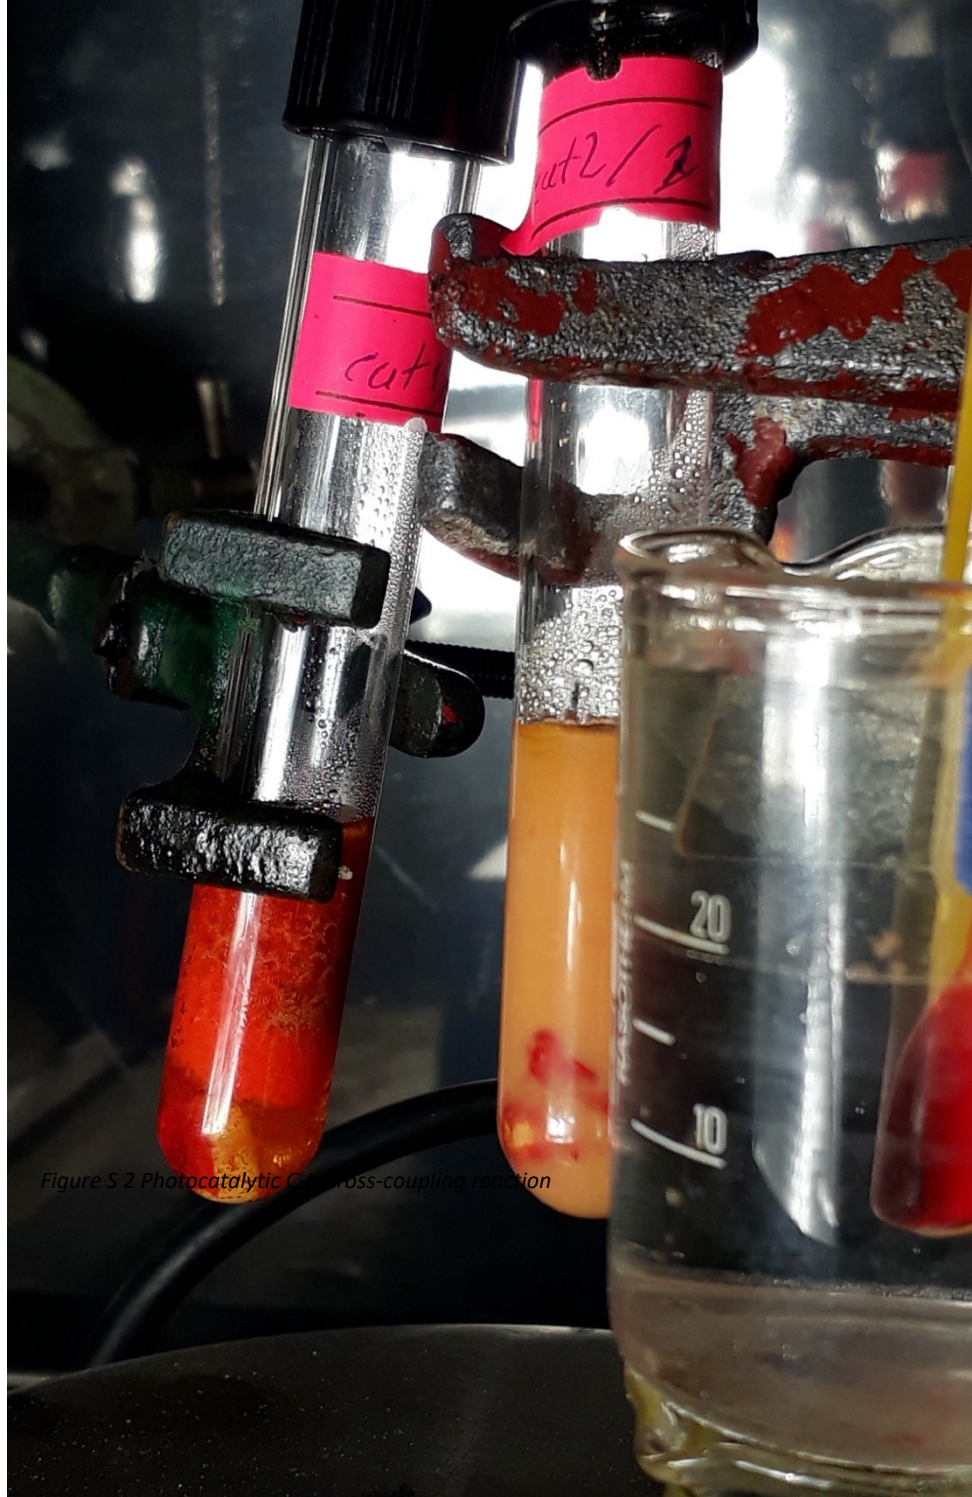

Figure S 2 Photocatalytic Cross-coupling reaction

## Supporting information

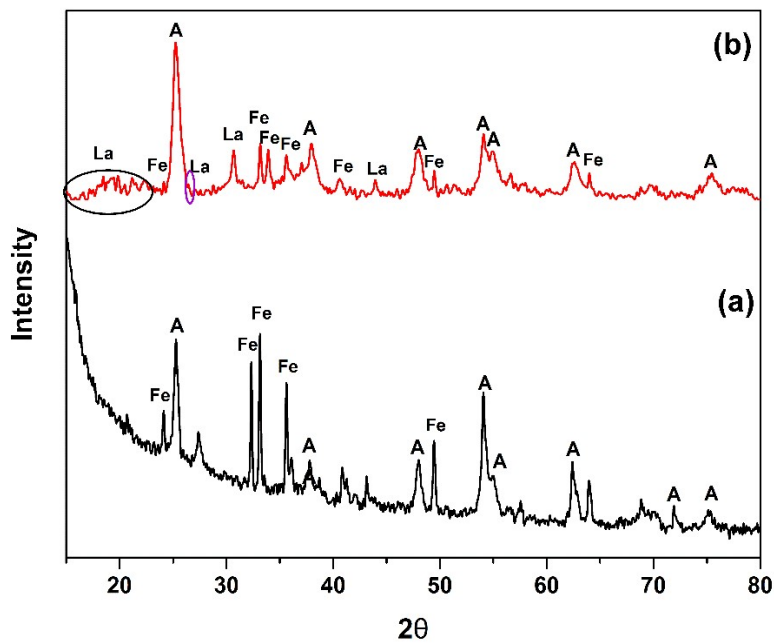

Figure S 3 PXRD pattern of (a)  $\text{TixFeyOz}$ , and (b)  $\text{TixFeyLamOz}$

Table S 2 Chemical-Physical Features of the Samples

| sample               | JCPDS       | crystal system | d value (anatase peak, 25.29Å) (nm) | crystallite size (nm) |
|----------------------|-------------|----------------|-------------------------------------|-----------------------|
| $\text{TixFeyOz}$    | 96-152-0849 | tetragonal     | 0.88                                | 16.3                  |
| $\text{TixFeyLamOz}$ | 96-900-9087 | tetragonal     | 0.75                                | 14.36                 |

## Supporting information

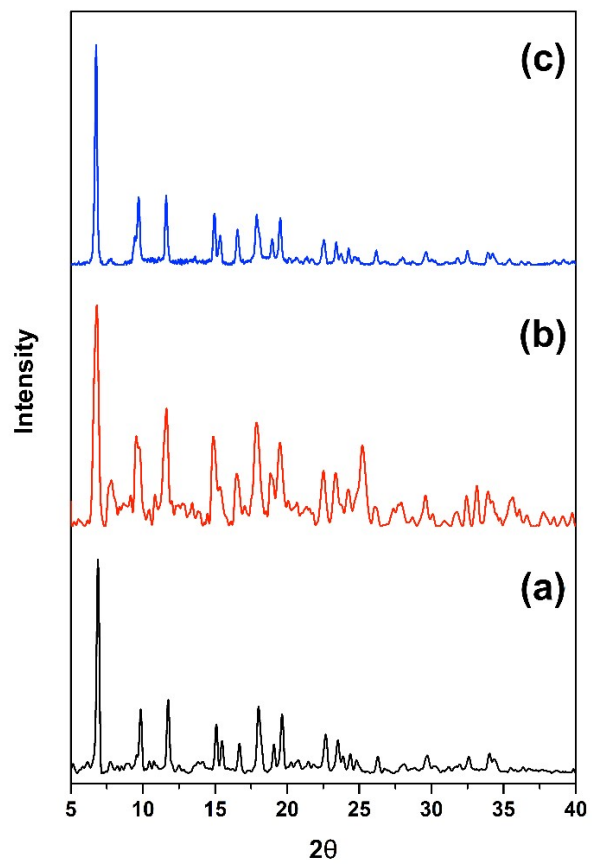

Figure S 4 PXR D pattern of (a) pristine MOF, (b) La@MOF and (c) Fe@MOF

## Supporting information

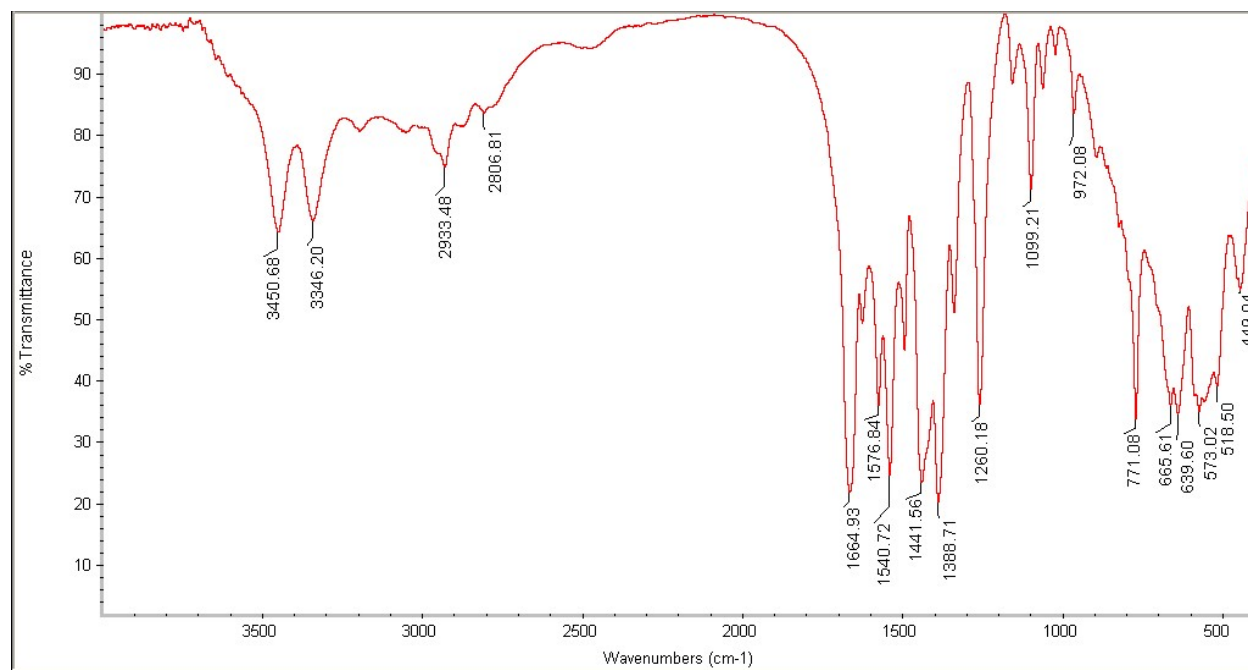

Figure S 5 FT-IR spectroscopy of Fe@MOF

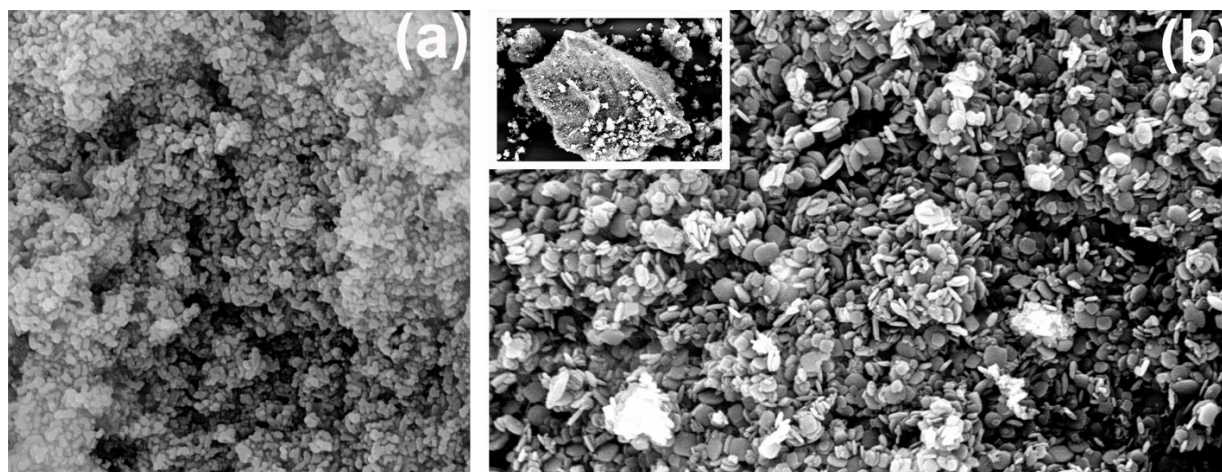

Figure S 6 FESEM image of (a) TixFeyOz, (b) Fe@MOF

## Supporting information

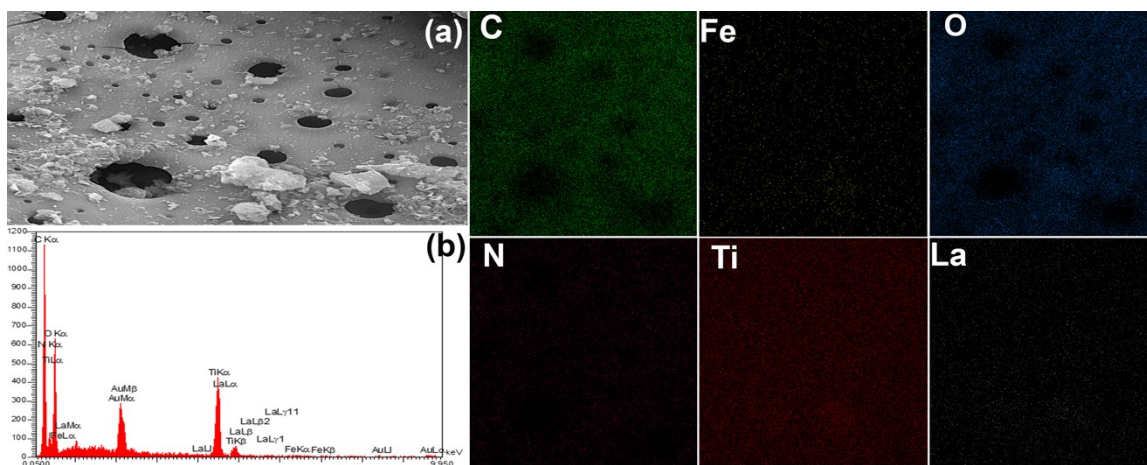

Figure S 7 EDX analysis of La(1)@MOF

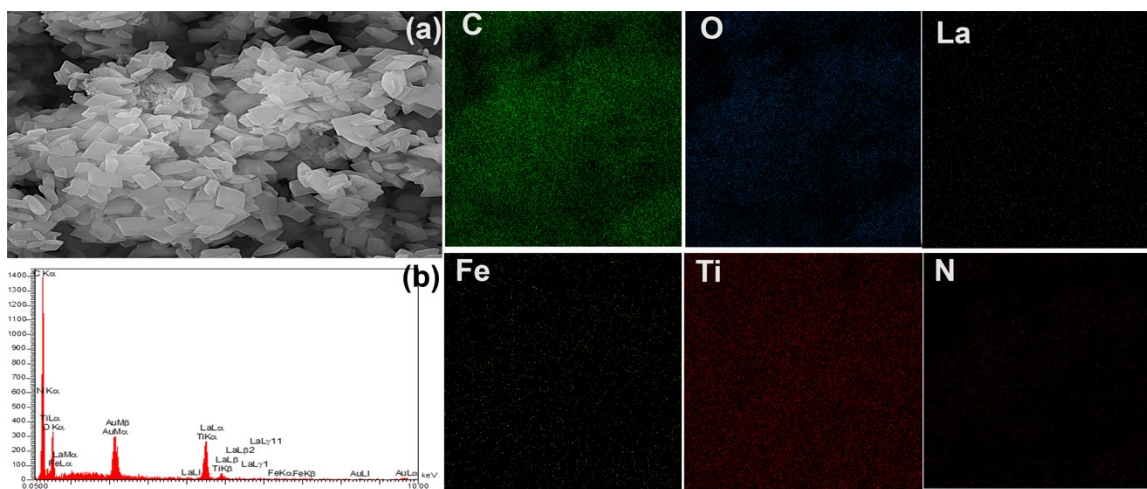

Figure S 8 EDX analysis of La(1.1)@MOF



## Supporting information

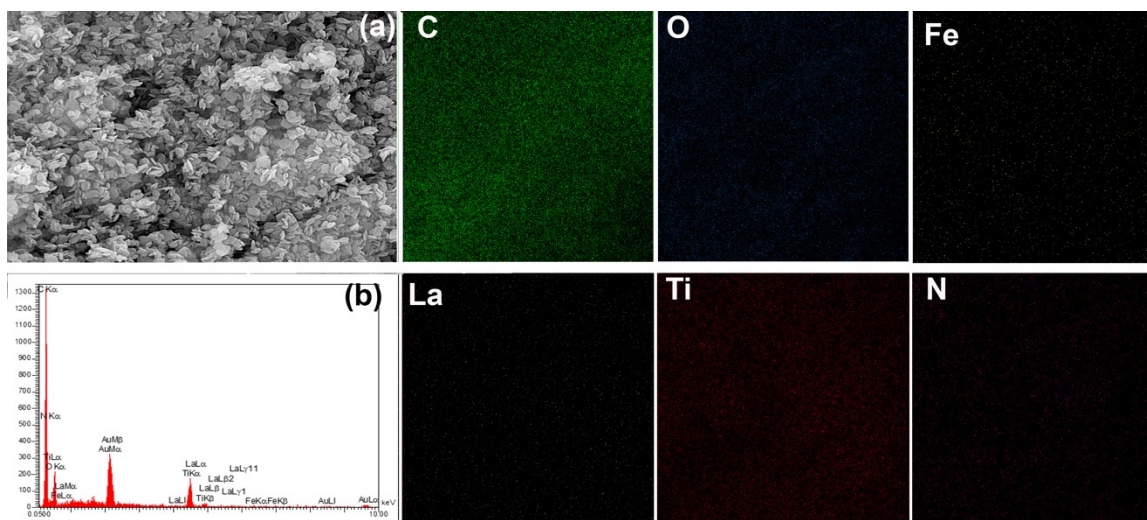

Figure S 9 EDX analysis of La(1.15)@MOF

Supporting information

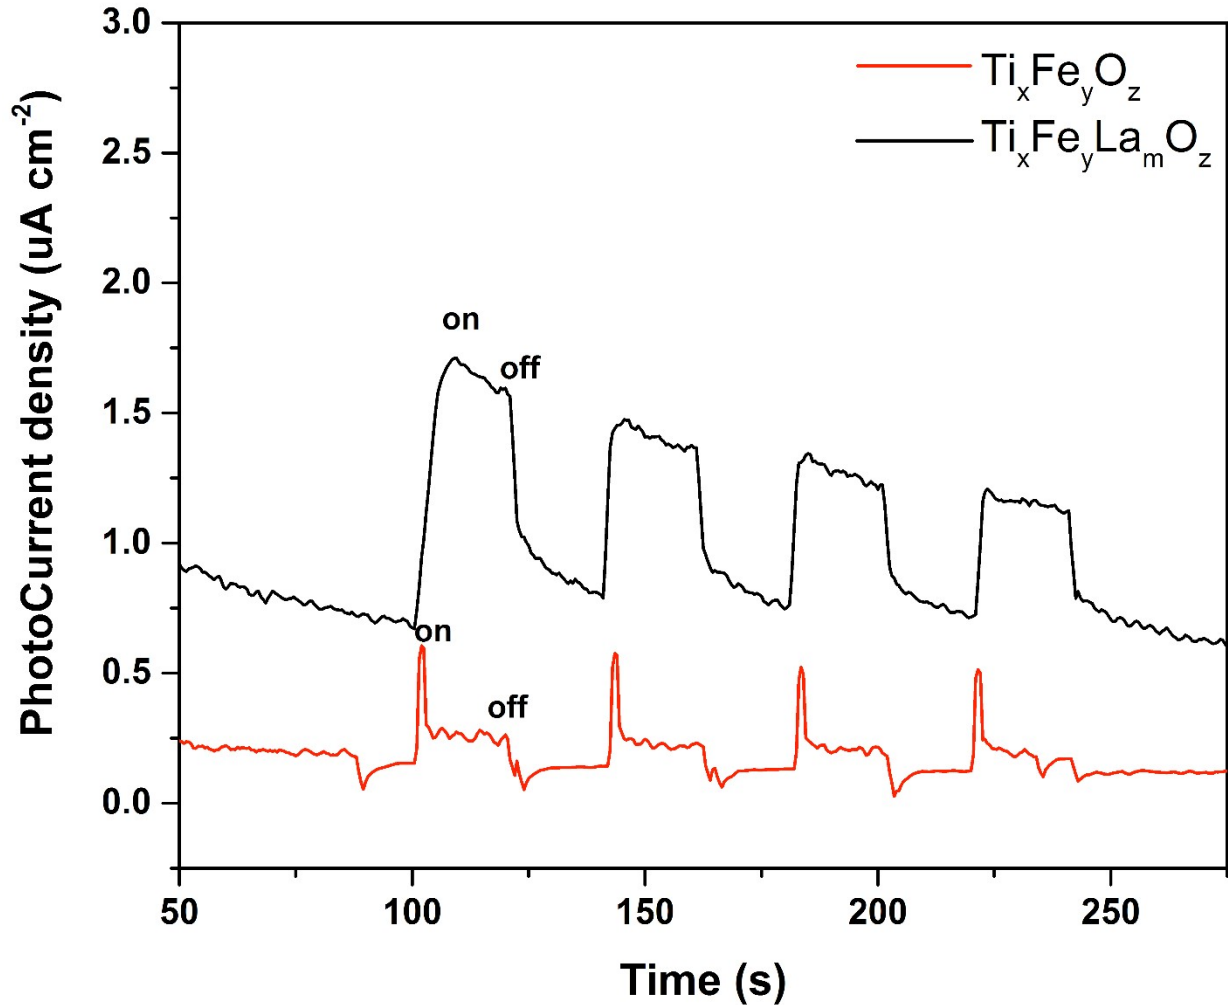

Figure S 10 Photocurrent transient response of Ti<sub>x</sub>Fe<sub>y</sub>O<sub>z</sub>, and Ti<sub>x</sub>Fe<sub>y</sub>La<sub>m</sub>O<sub>z</sub> nanoparticles under visible light irradiation

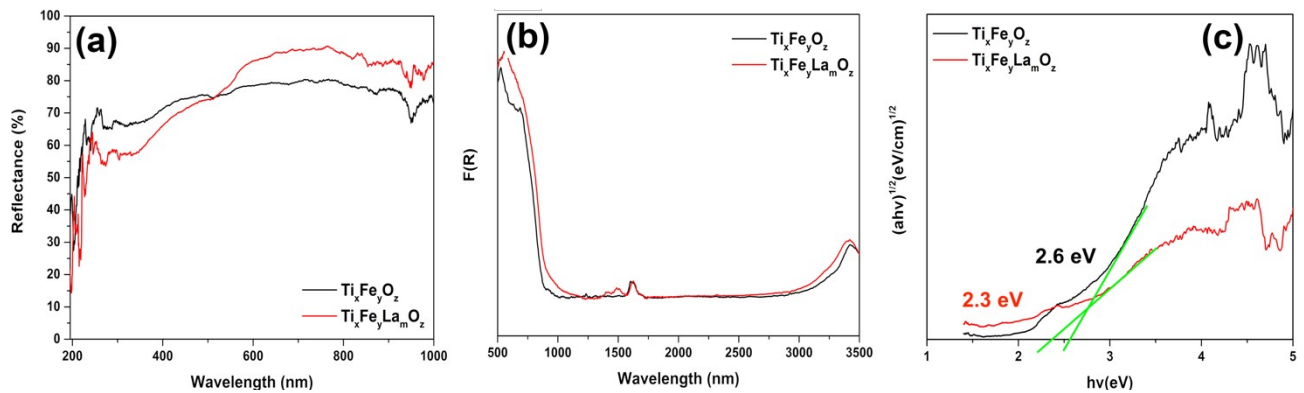

Figure S 11 (a) Diffuse reflectance spectra of Ti<sub>x</sub>Fe<sub>y</sub>O<sub>z</sub>, and Ti<sub>x</sub>Fe<sub>y</sub>La<sub>m</sub>O<sub>z</sub> nanoparticles; (b) UV-Vis Spectra of the Ti<sub>x</sub>Fe<sub>y</sub>O<sub>z</sub>, and Ti<sub>x</sub>Fe<sub>y</sub>La<sub>m</sub>O<sub>z</sub> nanoparticles; (c) the energy bandgap of the Ti<sub>x</sub>Fe<sub>y</sub>O<sub>z</sub>, and Ti<sub>x</sub>Fe<sub>y</sub>La<sub>m</sub>O<sub>z</sub> nanoparticles under the indirect transition assumption

## Supporting information

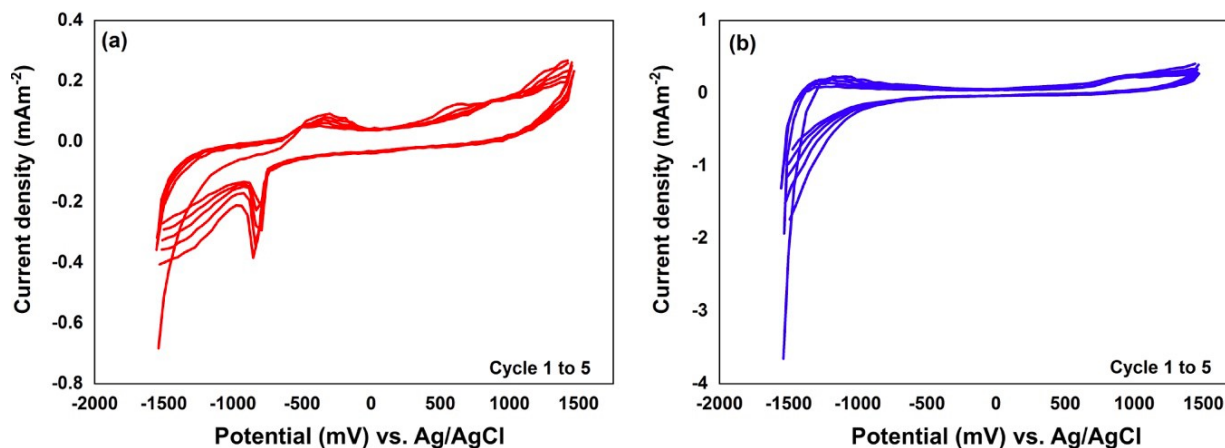

Figure S 12 (a) CV analysis of  $Ti_xFe_yO_z$  nanoparticle and (b)  $Ti_xFe_yLa_mO_z$  nanoparticle<sup>1</sup>

- **Synthesis 2,4-dinitro-N-phenylaniline:** 0.25mmol of Aniline was dissolved in the mix of  $H_2O$  and ethanol (2cc / 1:1), after obtaining a uniform solution, 0.3mmol of 2,4-dinitrochlorobenzene was added and allowed them to be uniform. Finally, photocatalyst was added and the mixture was exposed to sunlight (Mashhad, Iran on oct18-2022, 22°C). The control of the reaction was carried out by TLC each 15 min. The reaction was carried out for 60 min. The product was filtered and the precipitate was washed with ethyl acetate. Then the liquid was kept under the hood to evaporate the solvent. Before full evaporation, the obtained precipitate was filtered again by filter paper and recrystallized by ethyl acetate and then it was dried at the room temperature. M.P: 159 °C; FT-IR: 1620,1597,1583,1338,1270,1146,927,845; MS m/z: 259.06 ;  $^1H$  NMR (301 MHz, DMSO)  $\delta$  10.18 (s, 1H), 8.90 (d,  $J = 2.8$  Hz, 1H), 8.24 (dd,  $J = 9.6, 2.8$  Hz, 2H), 7.54 (dd,  $J = 8.5, 7.0$  Hz, 2H), 7.45 – 7.33 (m, 3H), 7.12 (d,  $J = 9.6$  Hz, 1H).  $^{13}C$  NMR (76 MHz, DMSO)  $\delta$  147.1 (C8), 138.1 (C10), 136.8 (C6), 131.67(C11), 130.3 (C9), 130.3 (C2,4), 127.4 (C12), 126.2 (C1,5), 123.9 (C3), 117.3 (C13)..

## Supporting information

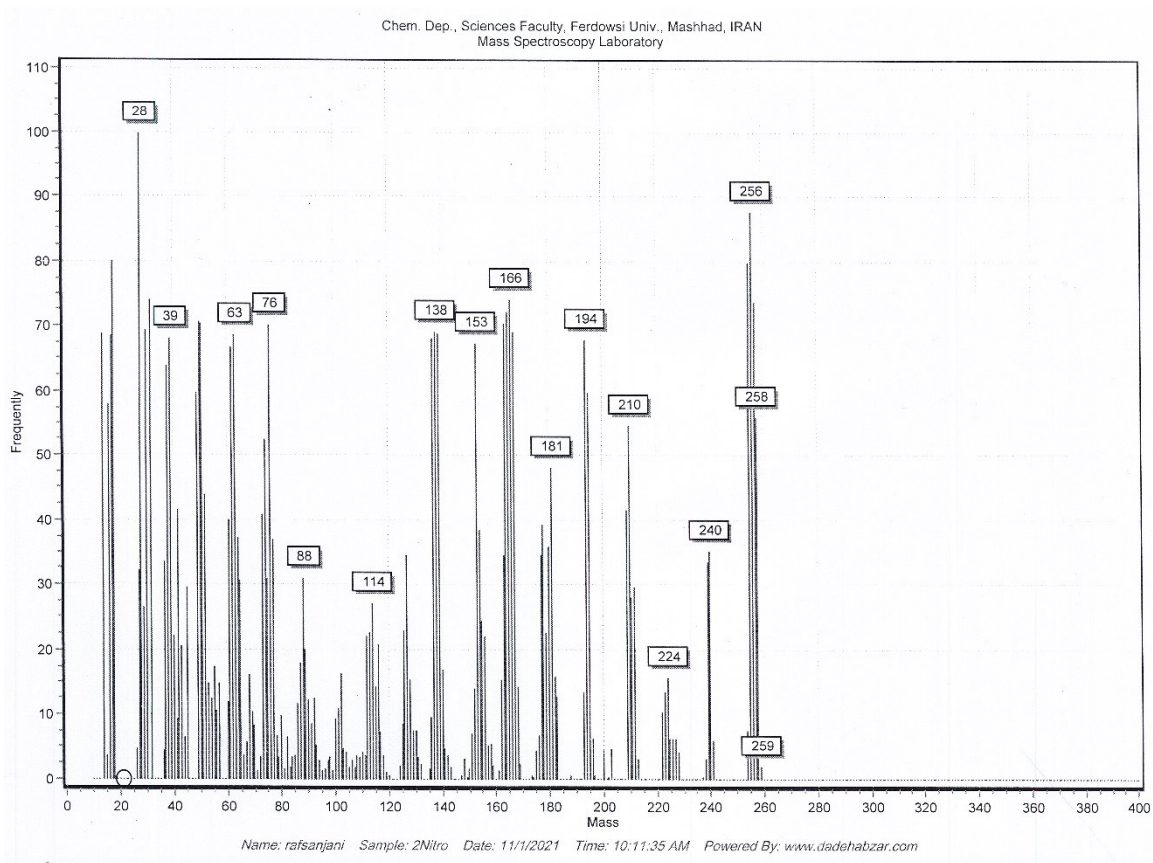

Figure S 13 Mass Spectroscopy of 2,4-dinitro-N-phenylaniline

## Supporting information

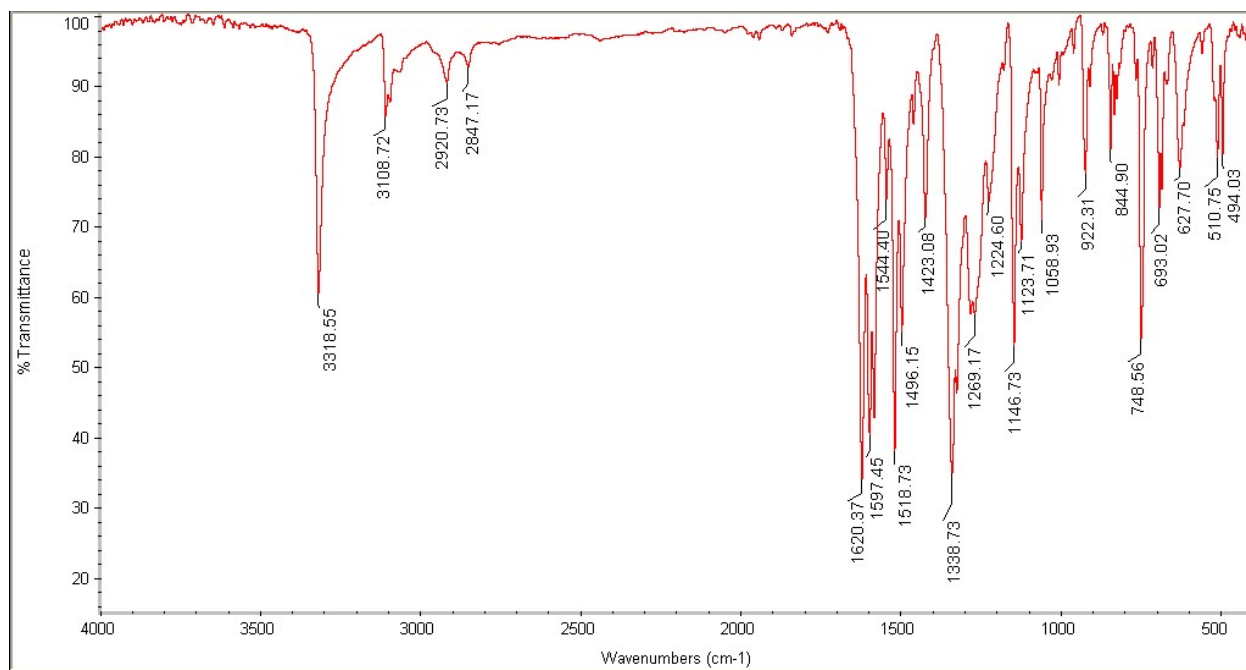

Figure S 14 FT-IR spectra of 2,4-dinitro-N-phenylaniline

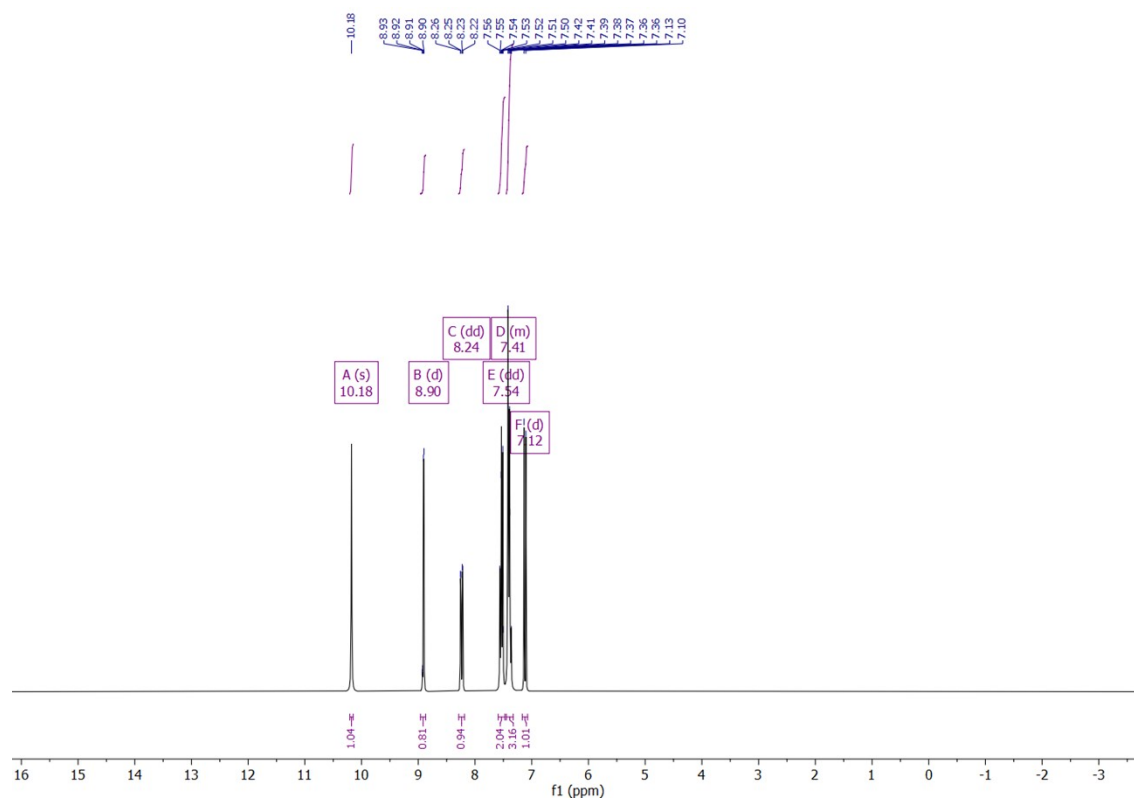

Figure S 15 <sup>1</sup>H-NMR spectra of 2,4-dinitro-N-phenylaniline

## Supporting information

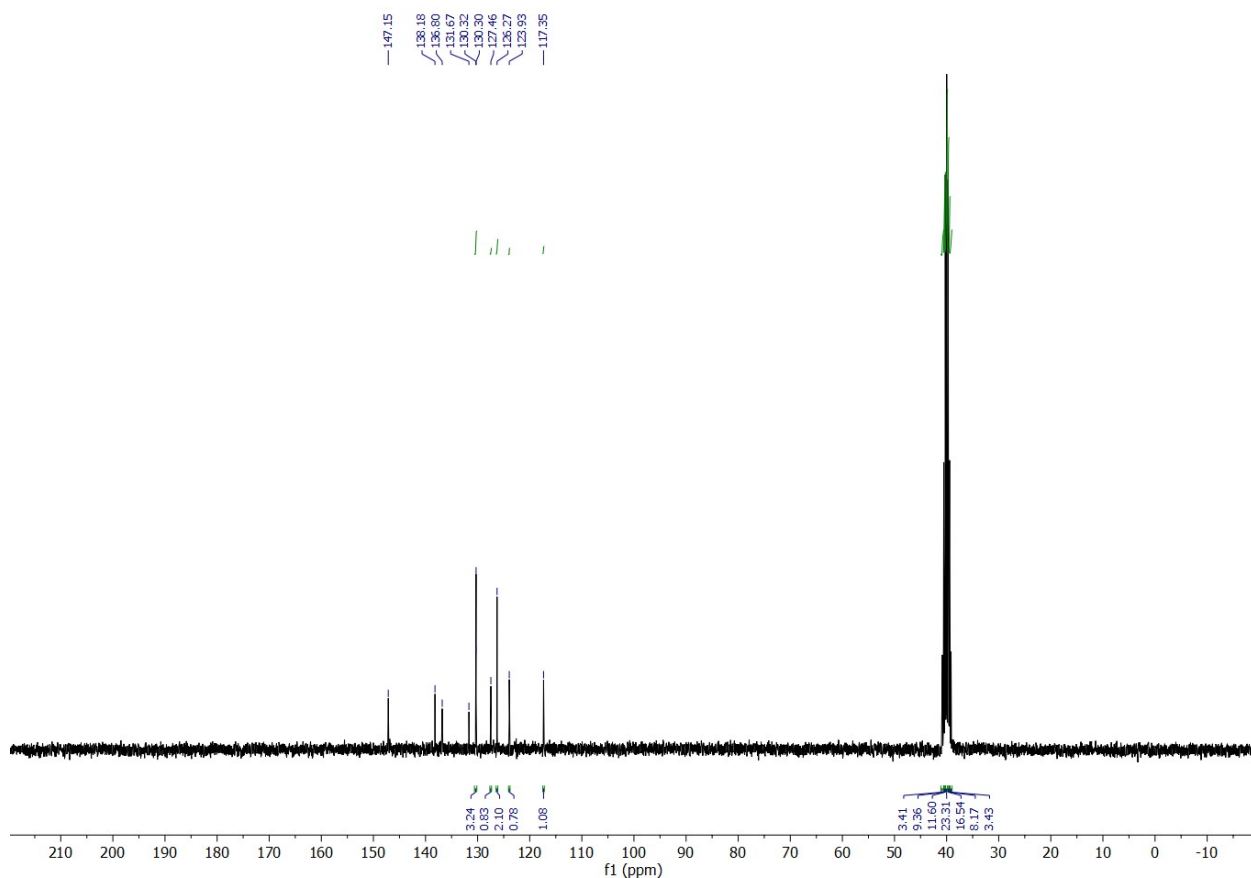

Figure S 16  $^{13}\text{C}$ -NMR spectra of 2,4-dinitro-N-phenylaniline

**Synthesis N-(4-Bromophenyl)-2,4-dinitroaniline:** 0.25mmol of 4-bromoaniline was dissolved in the mix of  $\text{H}_2\text{O}$  and ethanol (2cc / 1:1), after obtaining a uniform solution, 0.3mmol of 2,4-dinitrochlorobenzene was added and allowed them to be uniform. Finally, photocatalyst was added and the mixture was exposed to sunlight. The control of the reaction was carried out by TLC each 15 min. The reaction was carried out for 60 min. The product was filtered and the precipitate was washed with ethyl acetate. Then the liquid was kept under the hood to evaporate the solvent. Before full evaporation, the obtained precipitate was filtered again by filter paper and recrystallized by ethyl acetate and then it was dried at the room temperature. M.P:158  $^\circ\text{C}$ ; Ft-IR : 1617, 1593, 1518, 1338, 1289, 1221, 926, 833, 637,498 ; MS m/z : 338 ;  $^1\text{H}$  NMR (301 MHz, DMSO)  $\delta$  10.12 (s, 1H), 8.89 (d,  $J$  = 2.8 Hz, 1H), 8.23 (dd,  $J$  = 9.6, 2.8 Hz, 2H), 7.75 – 7.64 (m, 1H), 7.42 – 7.31 (m, 3H), 7.15 (d,  $J$  = 9.6 Hz, 1H).  $^{13}\text{C}$  NMR (76 MHz, DMSO)  $\delta$  146.5 (C8), 137.3 (C6), 132.3 (C2,4), 132.0 (C11), 129.7 (C12), 128.7 (C9), 125.0 (C1,5), 121.5 (C10), 117.8 (C13), 116.0 (C3).

## Supporting information

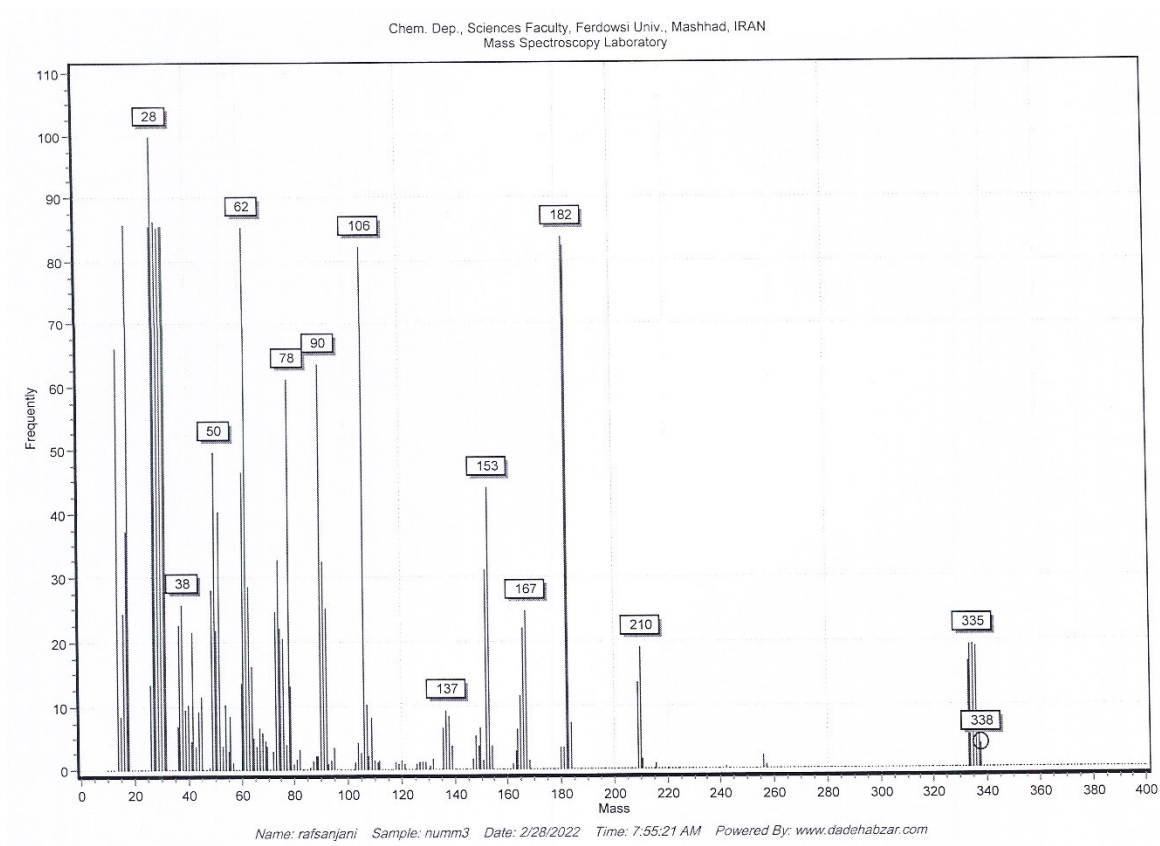

Figure S 17 Mass spectroscopy of *N*-(4-Bromophenyl)-2,4-dinitroaniline

## Supporting information

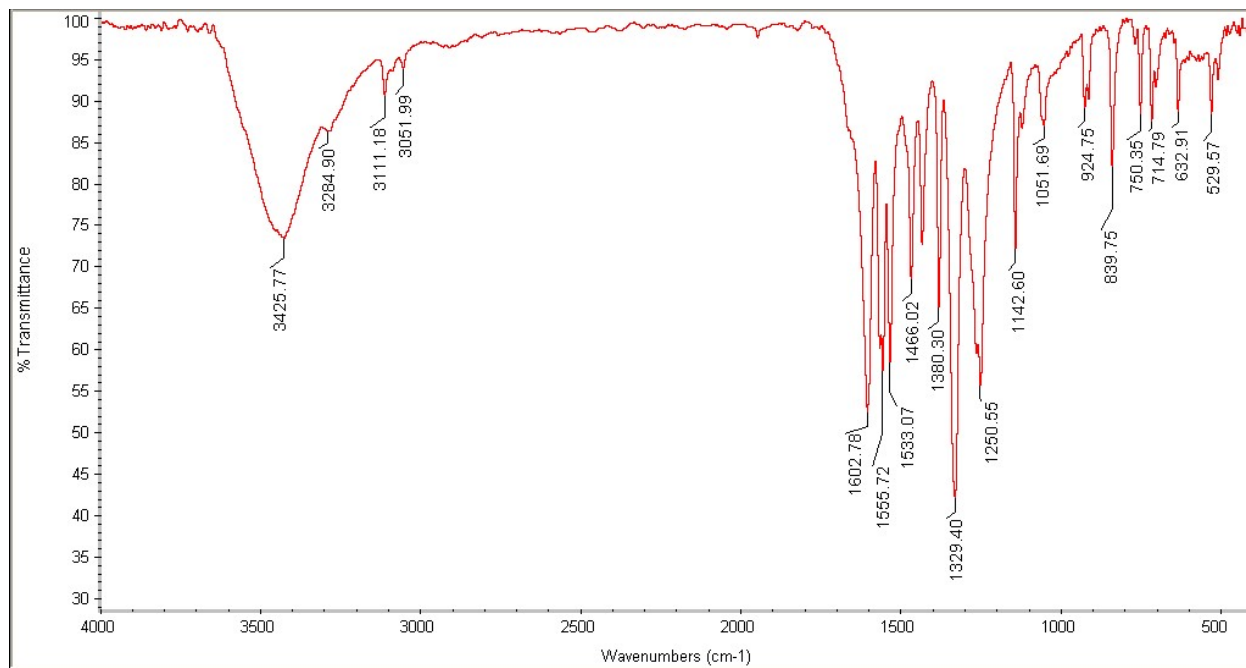

Figure S 18 FT-IR spectra of *N*-(4-Bromophenyl)-2,4-dinitroaniline

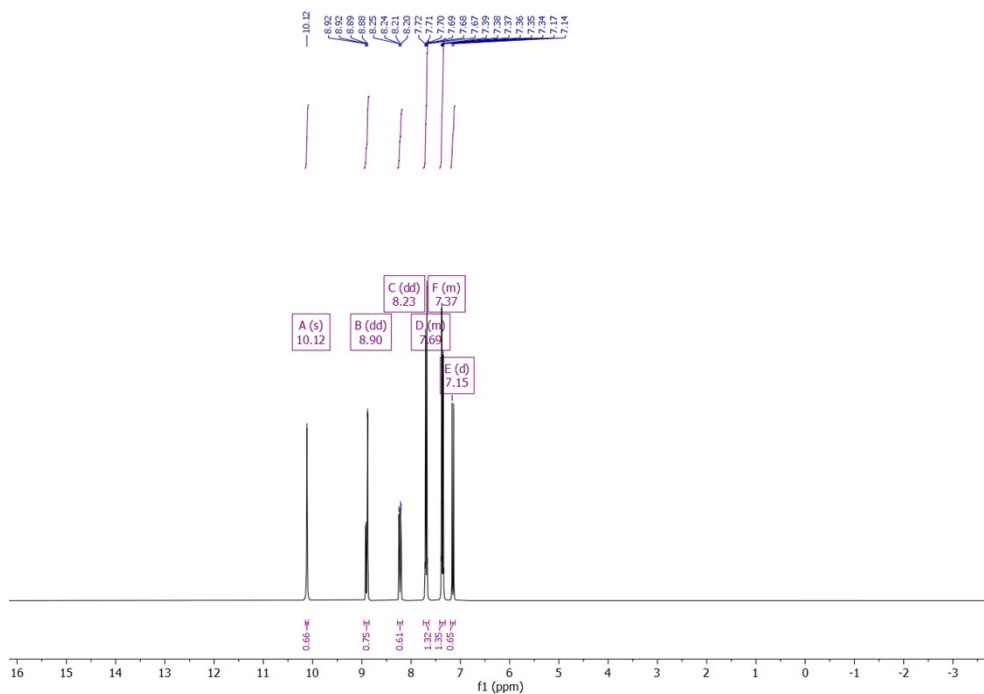

Figure S 19 <sup>1</sup>H-NMR spectra of *N*-(4-Bromophenyl)-2,4-dinitroaniline



## Supporting information

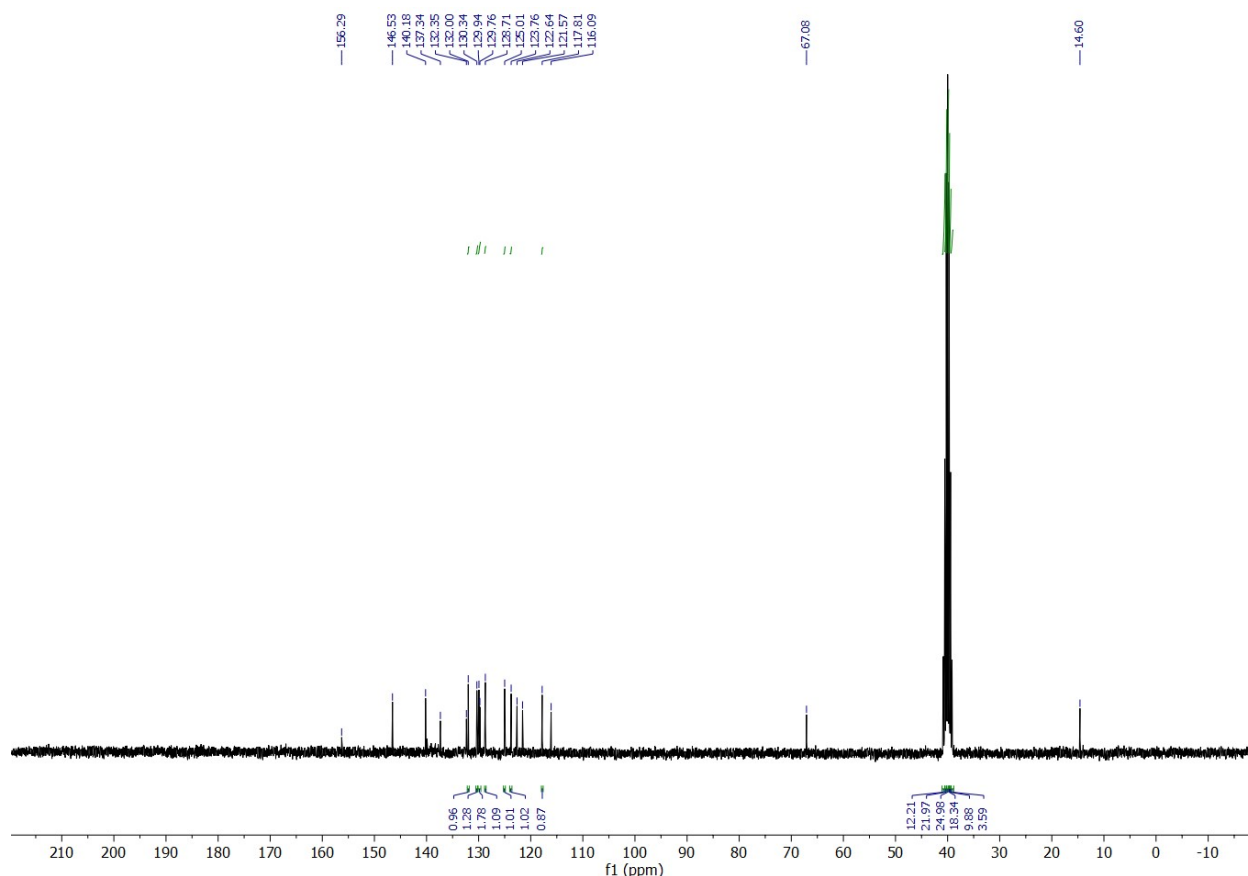

Figure S 20 C-NMR spectra of N-(4-Bromophenyl)-2,4-dinitroaniline

**Synthesis N-(2-Bromophenyl)-2,4-dinitroaniline:** 0.25mmol of 2-bromoaniline was dissolved in the mix of H<sub>2</sub>O and ethanol (2cc / 1:1), after obtaining a uniform solution, 0.3mmol of 2,4-dinitrochlorobenzene was added and allowed them to be uniform. Finally, photocatalyst was added and the mixture was exposed to sunlight. The control of the reaction was carried out by TLC each 15 min. The reaction was carried out for 60 min. The product was filtered and the precipitate was washed with ethyl acetate. Then the liquid was kept under the hood to evaporate the solvent. Before full evaporation, the obtained precipitate was filtered again by filter paper and recrystallized by ethyl acetate and then it was dried at the room temperature. M.P: 175-178°C; Ft-IR: 1607, 1538, 1395, 1289, 1154, 932, 834, 647, 528 ; MS m/z : 338 ; Hz, 2H), 8.22 (d, *J* = 2.8 Hz, 1H), 7.74 – 7.67 (m, 3H), 7.42 – 7.34 (m, 3H). <sup>13</sup>C NMR (76 MHz, DMSO) δ 146.7 (C8), 137.8 (C6), 133.5 (C4), 133.1 (C9), 132.1 (C11), 130.2 (C12), 129.7 (C2), 128.2 (C3), 123.8 (C1), 121.5 (C10), 119.6 (C13), 117.6 (C5).

## Supporting information

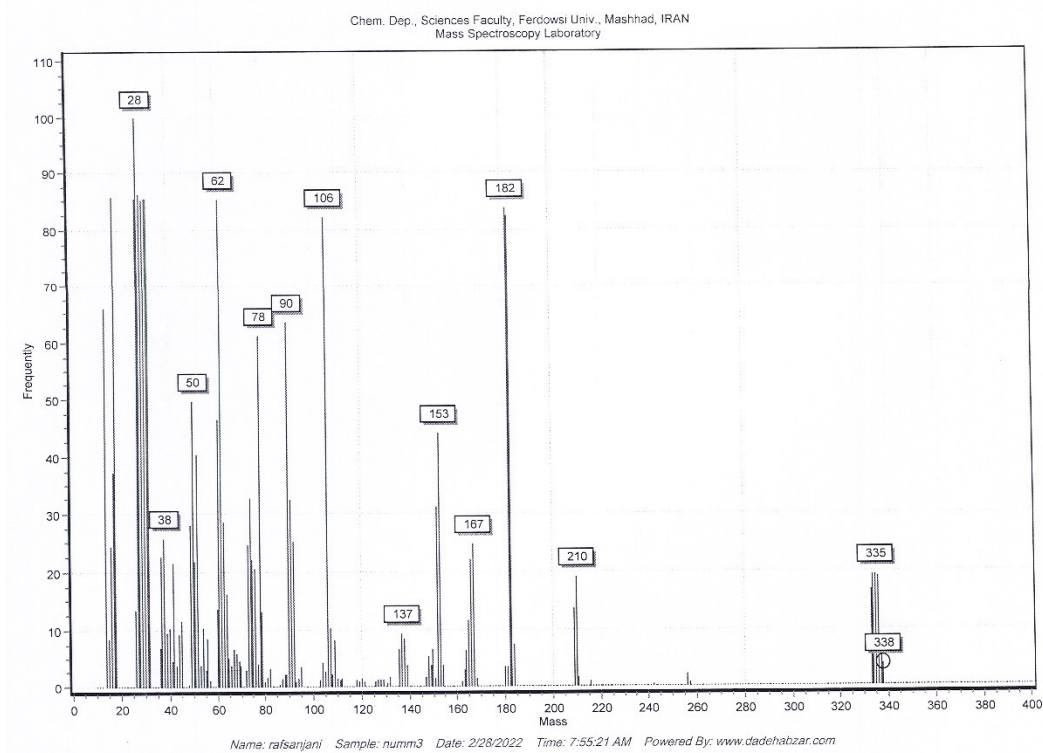

Figure S 21 Mass Spectroscopy of *N*-(2-Bromophenyl)-2,4-dinitroaniline

## Supporting information

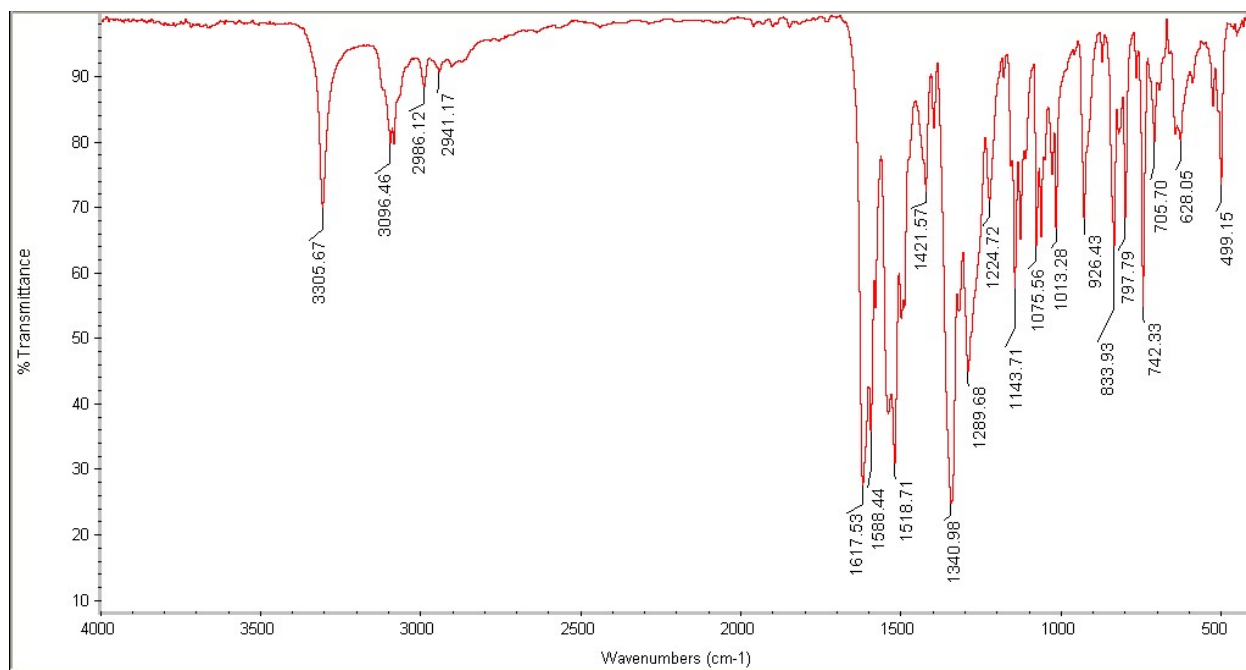

Figure S 22 FT-IR spectra of N-(2-Bromophenyl)-2,4-dinitroaniline

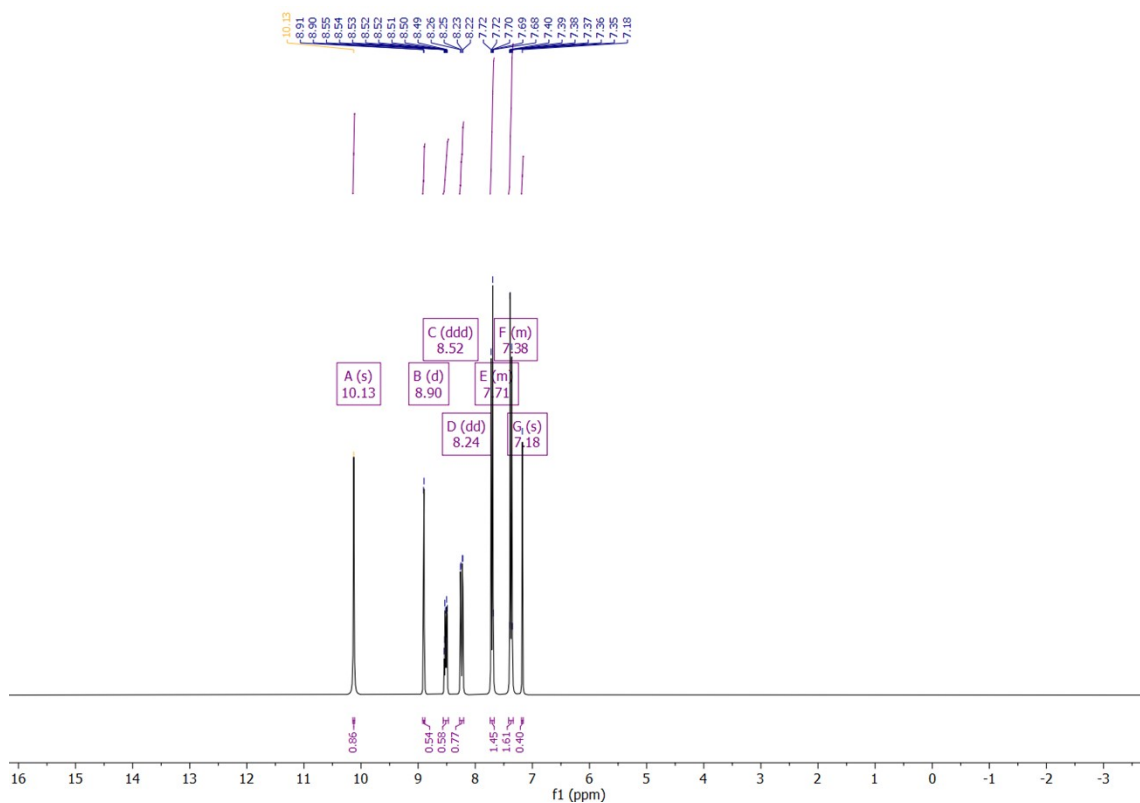

Figure S 23 <sup>1</sup>H-NMR spectra of N-(2-Bromophenyl)-2,4-dinitroaniline

## Supporting information

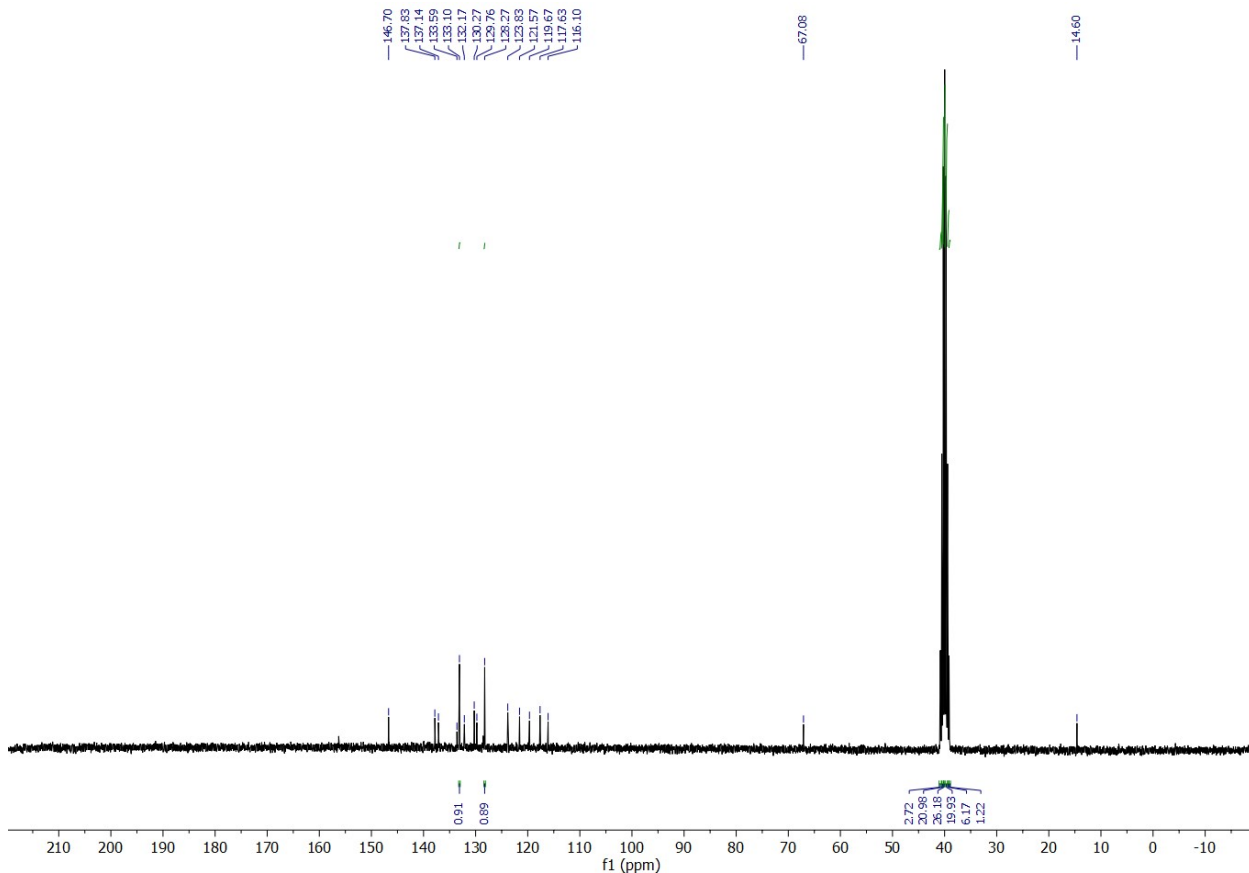

Figure S 24 C-NMR spectra of N-(2-Bromophenyl)-2,4-dinitroaniline

**Synthesis N-(3-Bromophenyl)-2,4-dinitroaniline:** 0.25mmol of 3-bromoaniline was dissolved in the mix of H<sub>2</sub>O and ethanol (2cc / 1:1), after obtaining a uniform solution, 0.3mmol of 2,4-dinitrochlorobenzene was added and allowed them to be uniform. Finally, photocatalyst was added and the mixture was exposed to sunlight. The control of the reaction was carried out by TLC each 15 min. The reaction was carried out for 60 min. The product was filtered and the precipitate was washed with ethyl acetate. Then the liquid was kept under the hood to evaporate the solvent. Before full evaporation, the obtained precipitate was filtered again by filter paper and recrystallized by ethyl acetate and then it was dried at the room temperature M.P: 174°C; Ft-IR: 1614, 1525, 1494, 1346, 1290, 1154, 933, 835, 649 ; MS m/z : 338 ; 1H NMR (301 MHz, DMSO)  $\delta$  10.14 (s, 1H), 8.89 (d,  $J$  = 2.7 Hz, 1H), 8.26 (dd,  $J$  = 9.5, 2.8 Hz, 2H), 7.68 – 7.36 (m, 3H), 7.19 (d,  $J$  = 9.5 Hz, 1H). 13C NMR (76 MHz, DMSO)  $\delta$  138.1 (C6), 136.8 (C8), 132.0 (C9), 130.3 (C2), 128.7

## Supporting information

(C12), 126.2 (C3), 125.0 (C5), 123.9 (C4), 121.5 (C1), 117.3 (C17), 116.1 (C13)

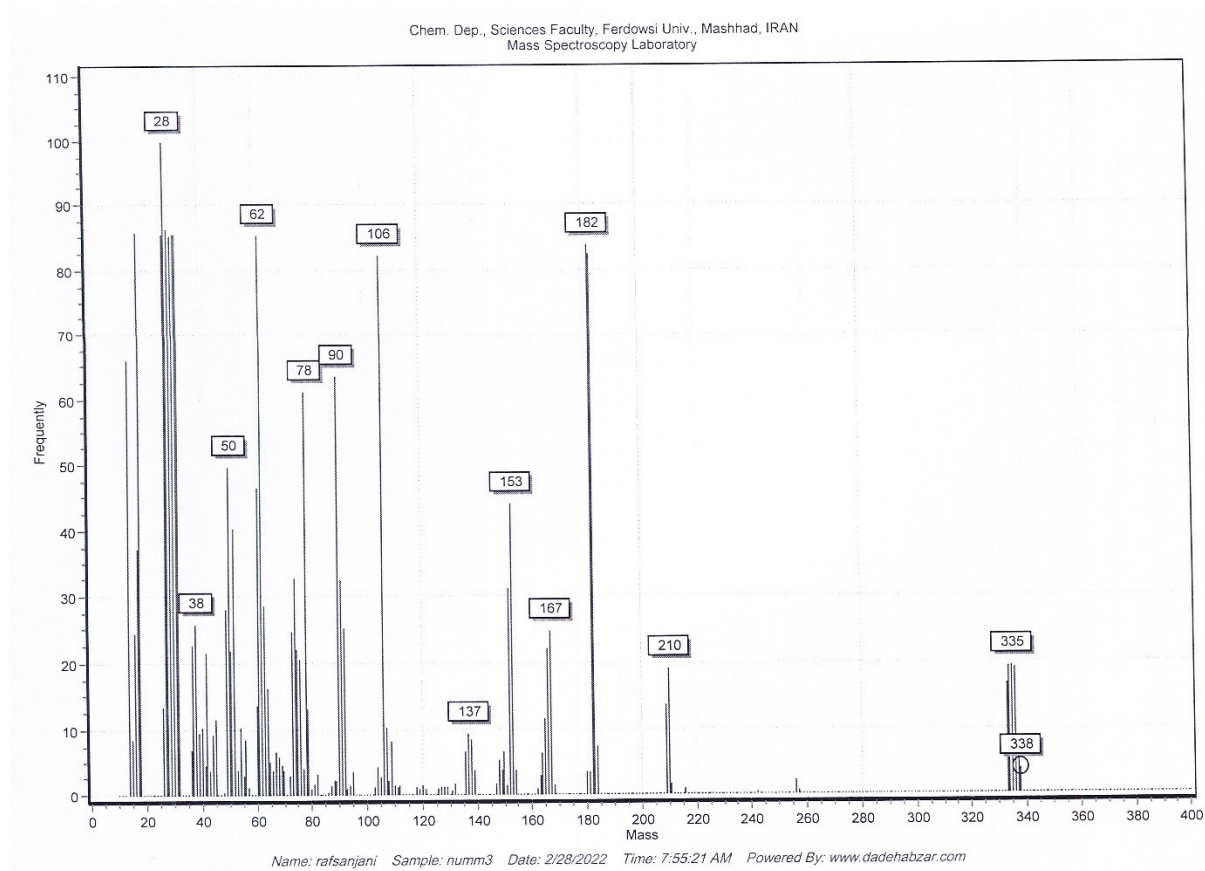

Figure S 25 Mass spectroscopy of N-(3-Bromophenyl)-2,4-dinitroaniline

## Supporting information

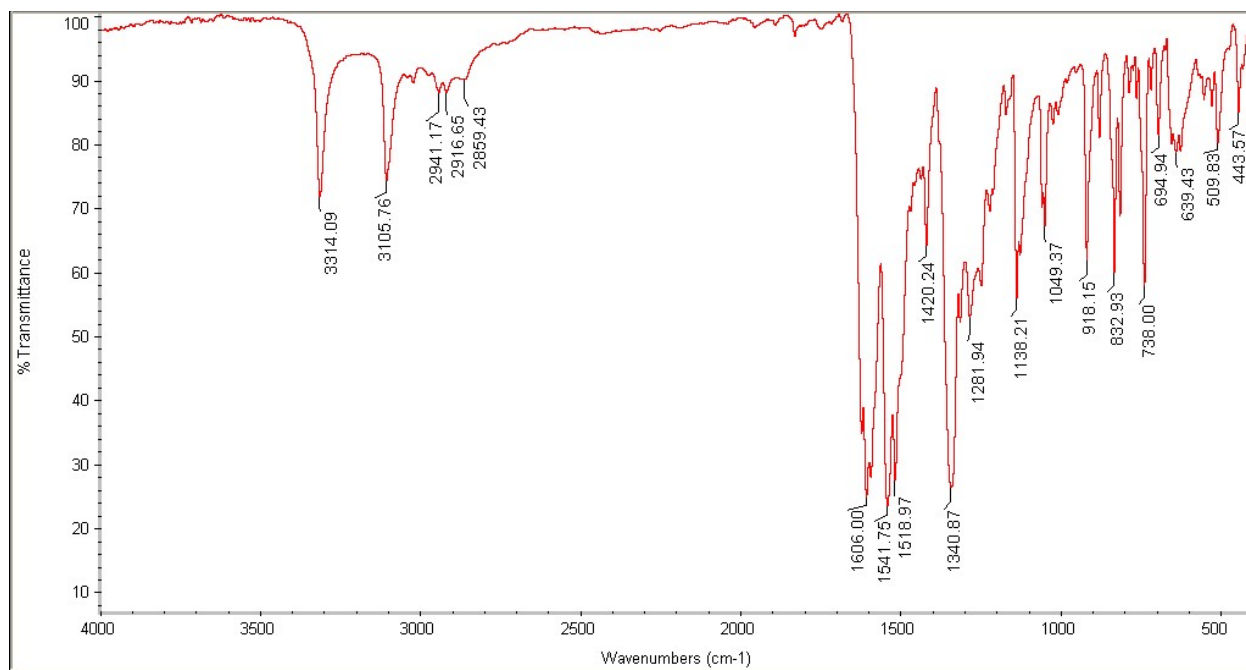

Figure S 26 FT-IR Spectra of *N*-(3-Bromophenyl)-2,4-dinitroaniline

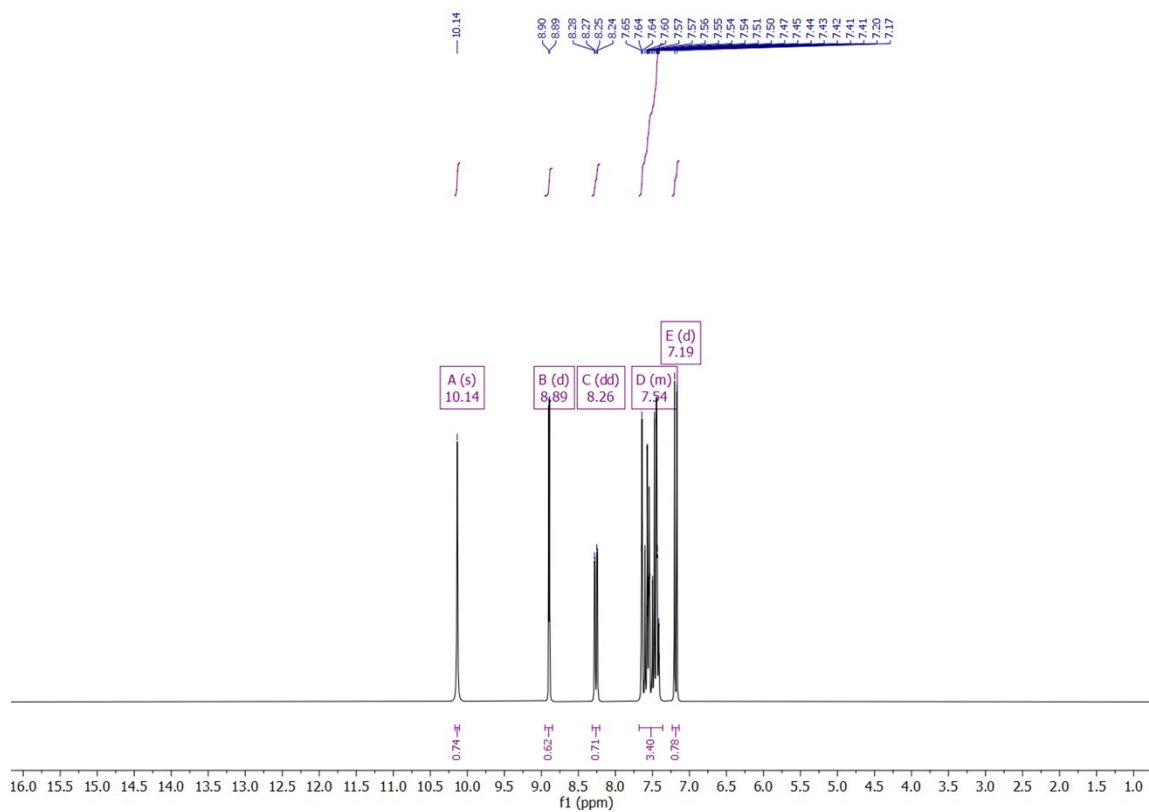

Figure S 27 <sup>1</sup>H-NMR spectra of *N*-(3-Bromophenyl)-2,4-dinitroaniline

## Supporting information

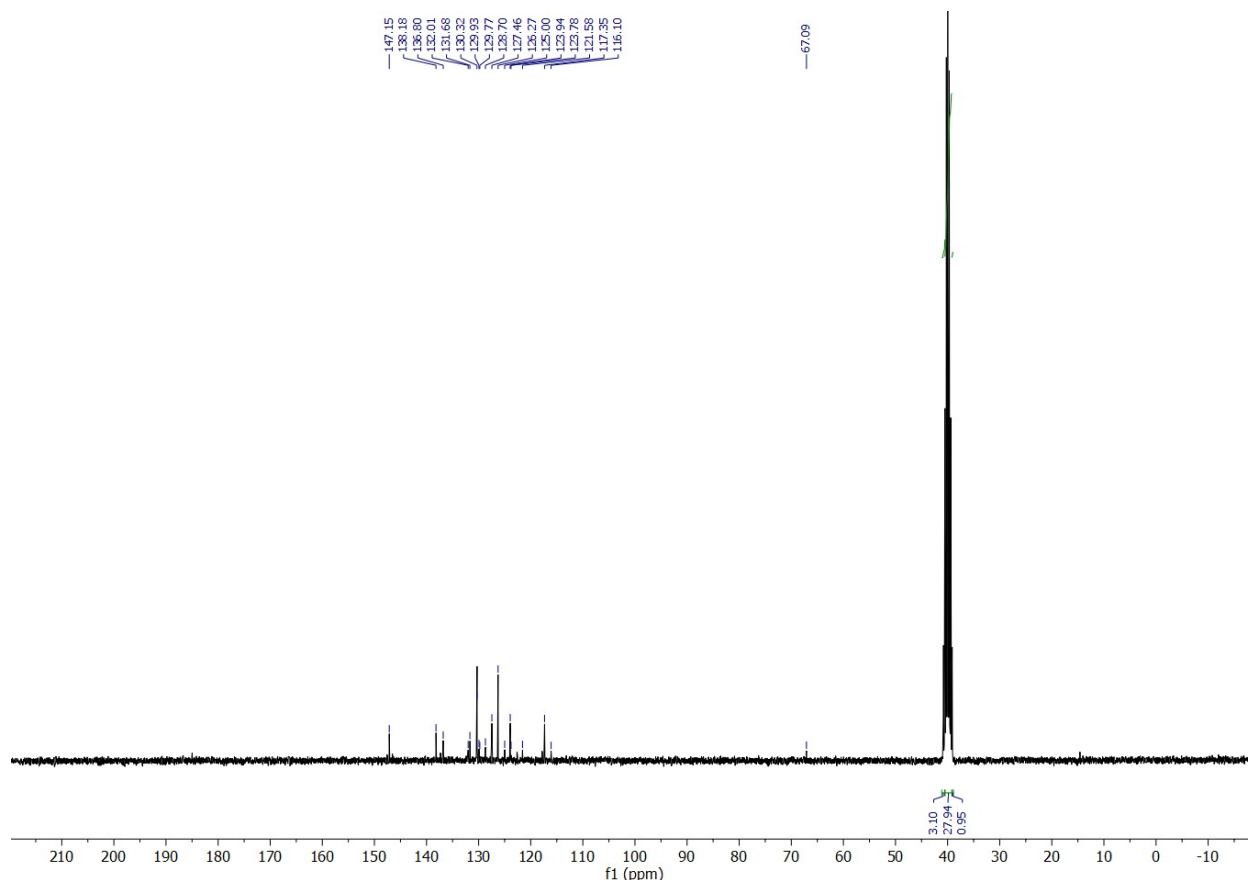

Figure S 28  $^{13}\text{C}$ -NMR spectra of *N*-(3-Bromophenyl)-2,4-dinitroaniline

**Synthesis *N*-(3,4-dimethylphenyl)-2,4-dinitroaniline :** 0.25mmol of 3,4-dimethylaniline was dissolved in the mix of  $\text{H}_2\text{O}$  and ethanol (2cc / 1:1), after obtaining a uniform solution, 0.3mmol of 2,4-dinitrochlorobenzene was added and allowed them to be uniform. Finally, photocatalyst was added and the mixture was exposed to sunlight. The control of the reaction was carried out by TLC each 15 min. The reaction was carried out for 60 min. The product was filtered and the precipitate was washed with ethyl acetate. Then the liquid was kept under the hood to evaporate the solvent. Before full evaporation, the obtained precipitate was filtered again by filter paper and recrystallized by ethyl acetate and then it was dried at the room temperature. M.P: 154-155 $^\circ\text{C}$  ;FT-IR: 2945, 2920, 1609, 1542, 1516, 1338, 1287, 1138, 918, 832; MS  $m/z(\text{M}^+)$  : 289 ;  $^1\text{H}$  NMR (301 MHz, DMSO)  $\delta$  10.10 (s, 1H), 8.88 (d,  $J = 2.8$  Hz, 1H), 8.20 (dd,  $J = 9.6, 3.4$  Hz, 2H), 7.28 (d,  $J = 8.0$  Hz, 1H), 7.17 (d,  $J = 2.3$  Hz, 1H), 7.13 – 7.02 (m, 3H), 2.27 (d,  $J = 2.5$  Hz, 1H).  $^{13}\text{C}$  NMR (76 MHz, DMSO)  $\delta$  147.5 (C8), 138.4 (C4), 135.8 (C6), 133.5 (C3), 131.2 (C9), 131.1 (C11), 130.2 (C2), 127.3 (s,C12), 123.7 (C5), 121.5 (C10), 117.3 (C13,1), 19.8 (C14), 19.4 (C15).

## Supporting information

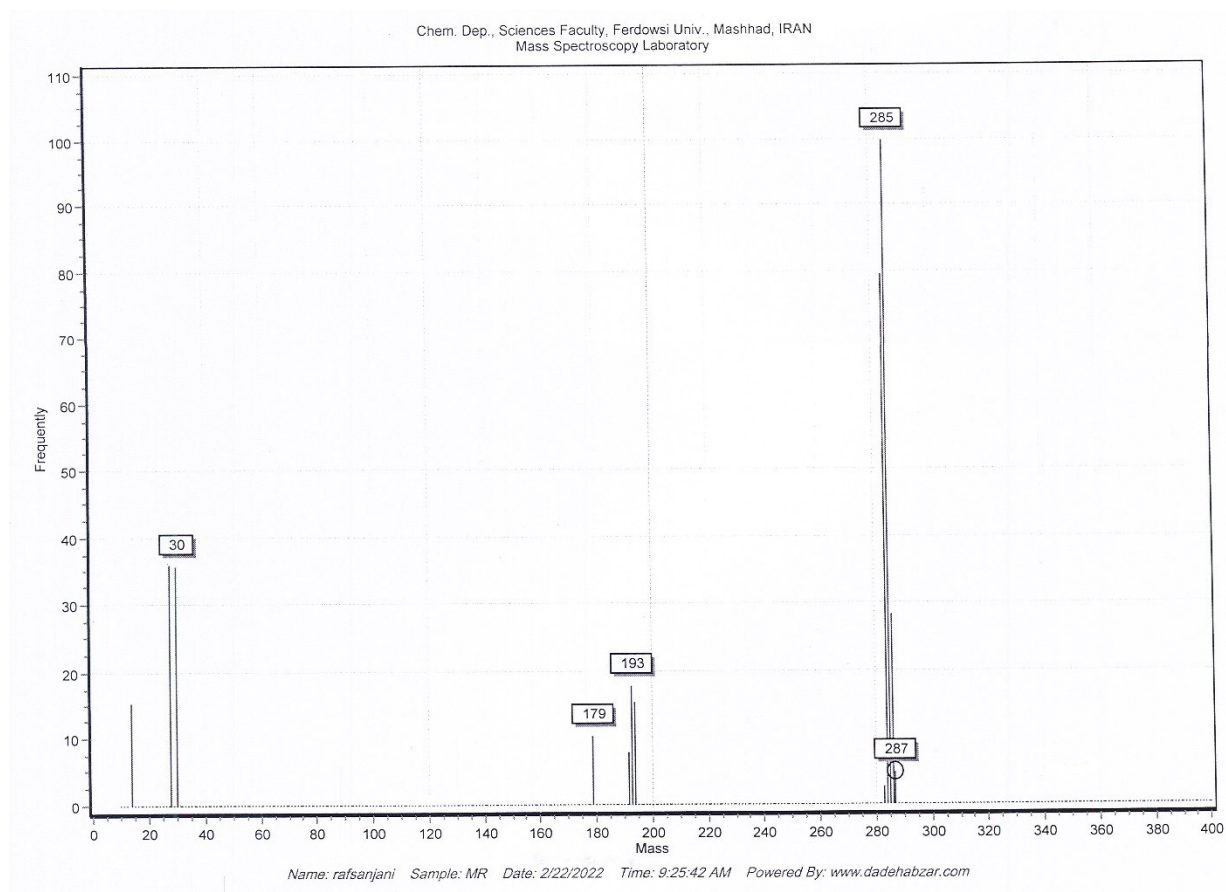

Figure S 29 Mass Spectroscopy of *N*-(3,4-dimethylphenyl)-2,4-dinitroaniline



## Supporting information

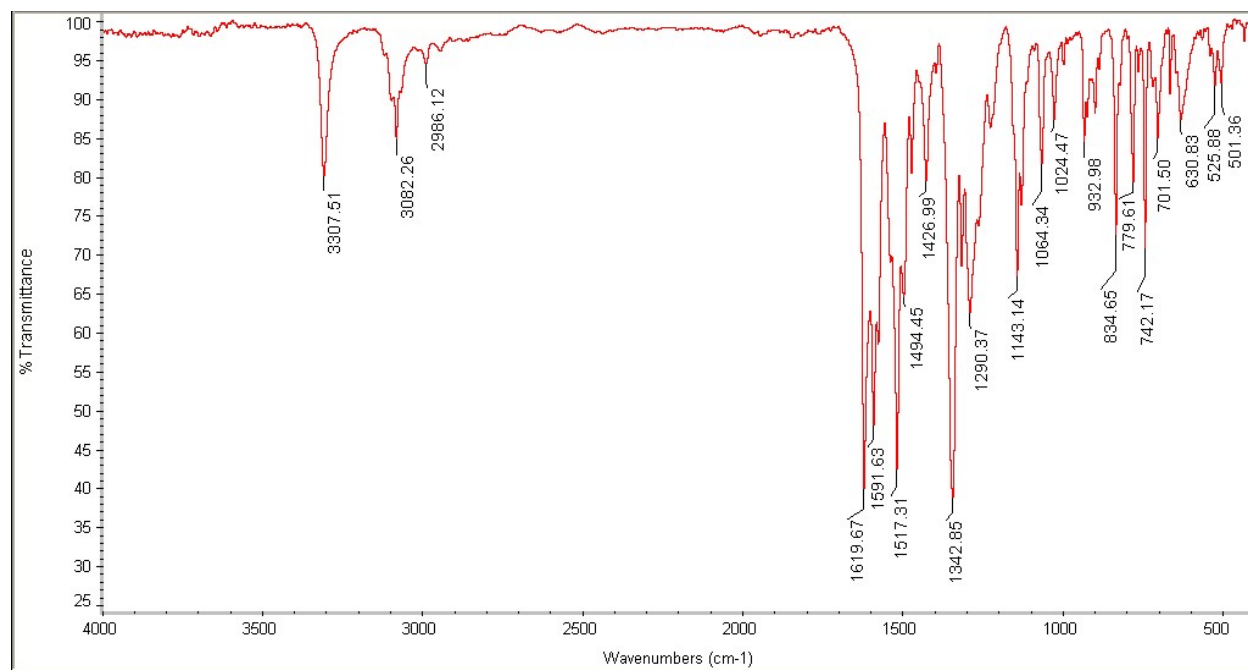

Figure S 30 FT-IR Spectra of *N*-(3,4-dimethylphenyl)-2,4-dinitroaniline

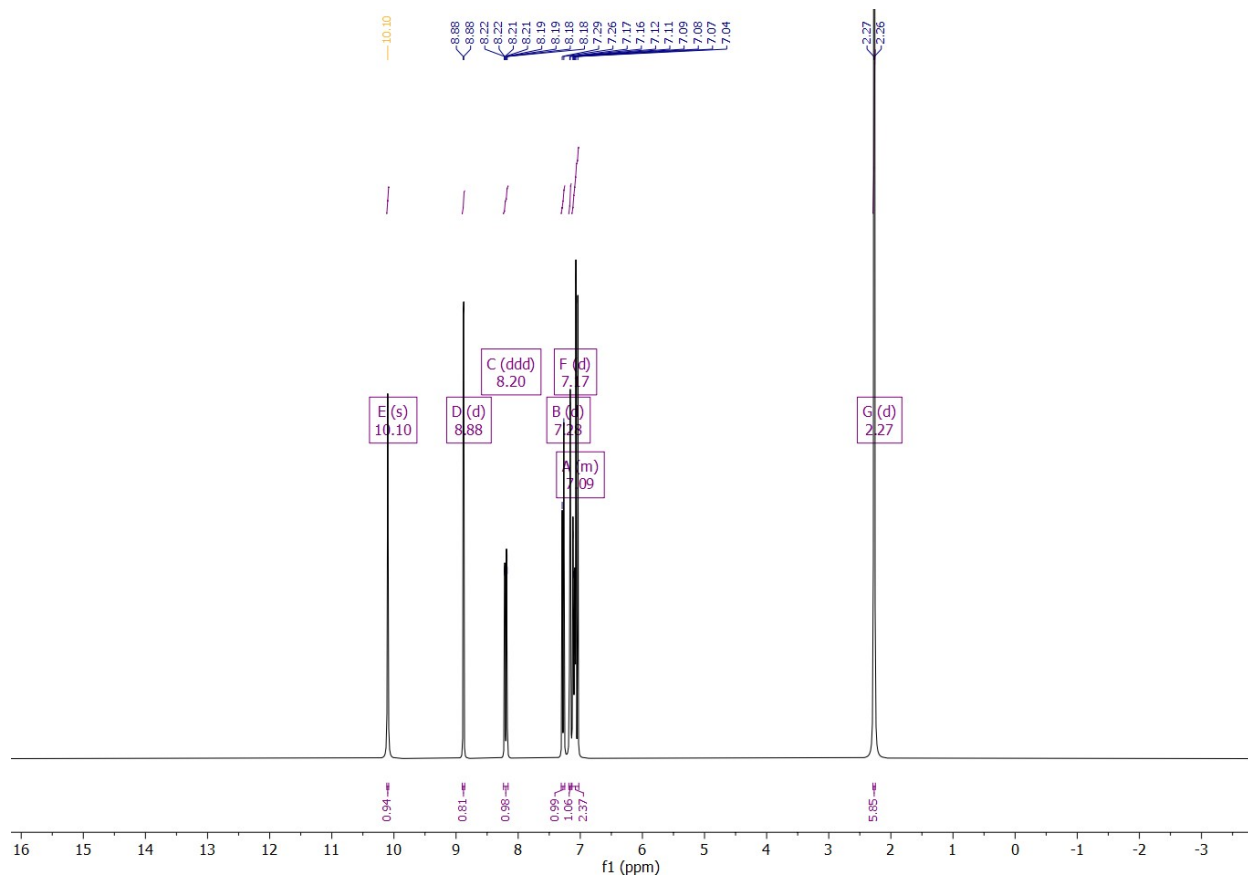

Figure S 31 <sup>1</sup>H-NMR Spectra of *N*-(3,4-dimethylphenyl)-2,4-dinitroaniline

## Supporting information

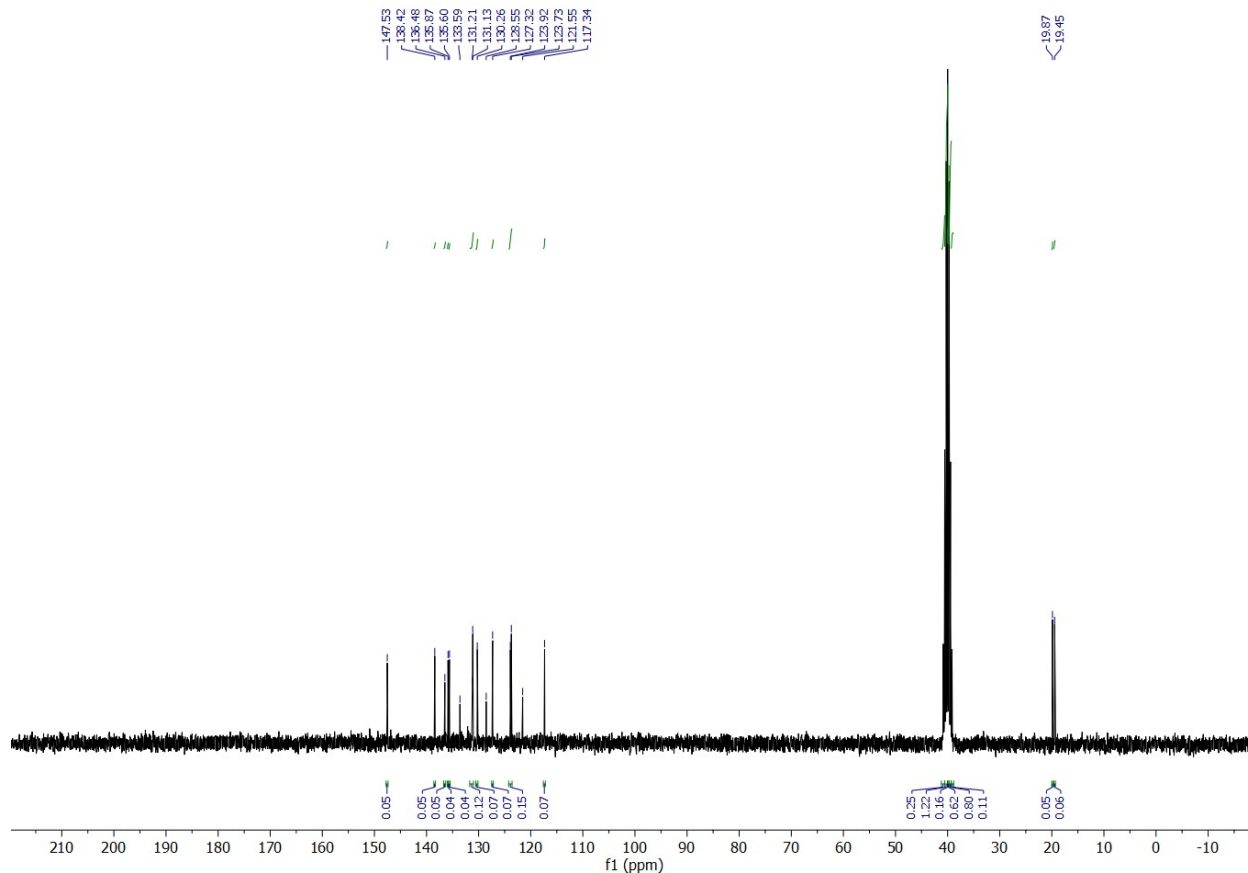

Figure S 32 C-NMR Spectra of N-(3,4-dimethylphenyl)-2,4-dinitroaniline

**Synthesis 2,4-dinitro-N-(p-tolyl):** 0.25mmol of p-tolyaniline was dissolved in the mix of H<sub>2</sub>O and ethanol (2cc / 1:1), after obtaining a uniform solution, 0.3mmol of 2,4-dinitrochlorobenzene was added and allowed them to be uniform. Finally, photocatalyst was added and the mixture was exposed to sunlight. The control of the reaction was carried out by TLC each 15 min. The reaction was carried out for 60 min. The product was filtered and the precipitate was washed with ethyl acetate. Then the liquid was kept under the hood to evaporate the solvent. Before full evaporation, the obtained precipitate was filtered again by filter paper and recrystallized by ethyl acetate and then it was dried at the room temperature M.P:141-142°C; Ft-IR: 2921, 1621, 1581, 1518, 1336, 1284, 1220, 1141, 918, 803; MS m/z(M<sup>+</sup>): 274; 1H NMR (301 MHz, DMSO)  $\delta$  10.11 (s, 1H), 8.90 (d,  $J$  = 2.8 Hz, 1H), 8.22 (dd,  $J$  = 9.6, 2.8 Hz, 2H), 8.11 (d,  $J$  = 8.9 Hz, 0H), 7.29 (d,  $J$  = 8.0 Hz, 1H), 7.21 – 7.01 (m, 3H), 2.27 (s, 1H). 13C NMR (76 MHz, DMSO)  $\delta$  148.0 (C8), 136.3 (C6), 133.5 (C3), 131.0 (C11), 130.6 (C2,4), 130.2 (C12), 128.2 (C9), 123.9 (C1,5), 121.5 (C10), 117.1 (C13), 55.8 (C14).

## Supporting information

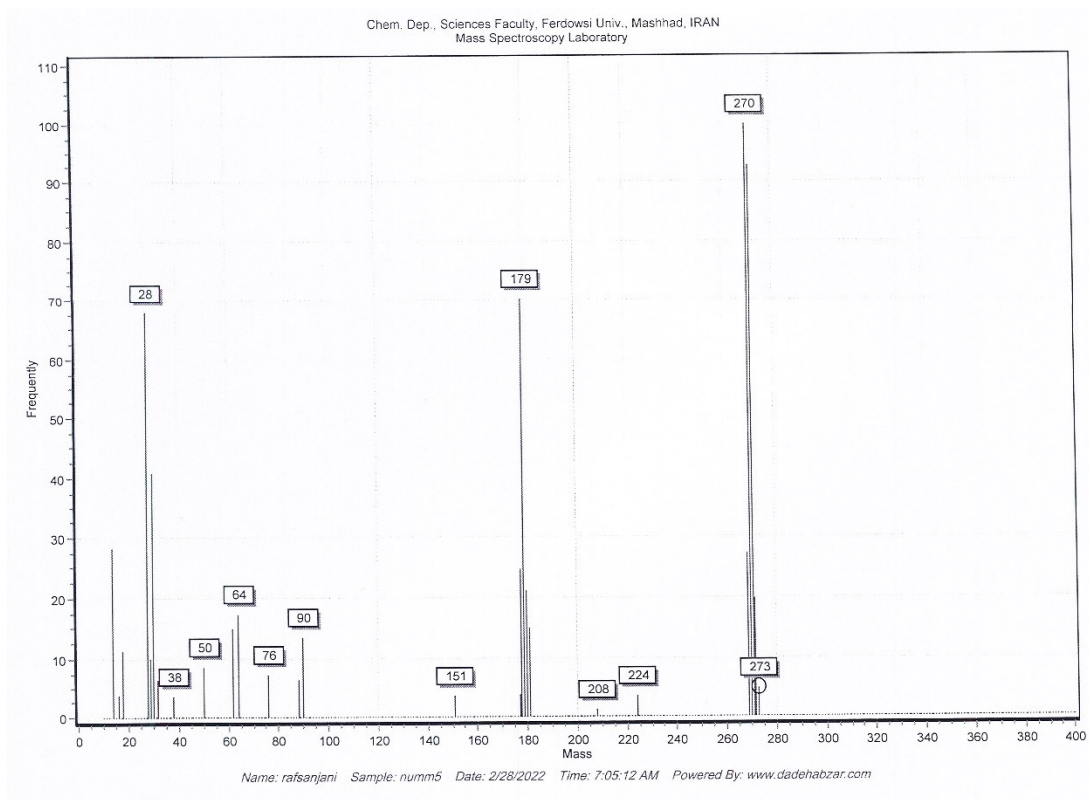

Figure S 33 Mass spectroscopy of 2,4-dinitro-N-(p-tolyl)

## Supporting information

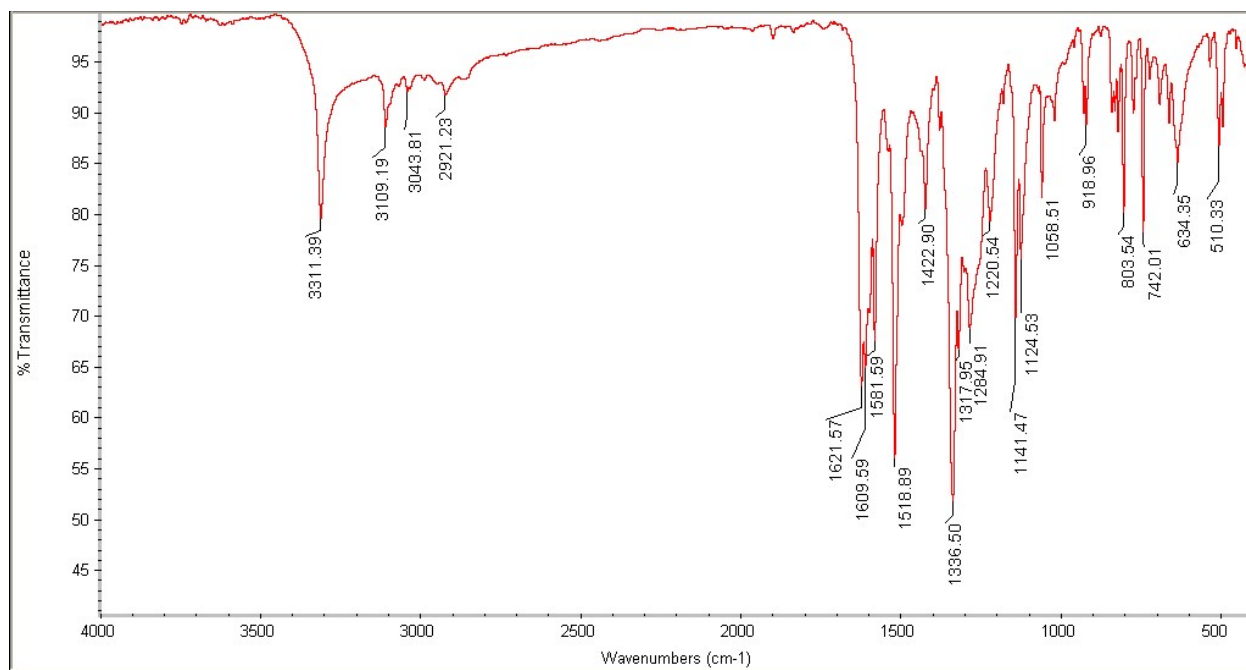

Figure S 34 FT-IR Spectroscopy of 2,4-dinitro-N-(p-tolyl)

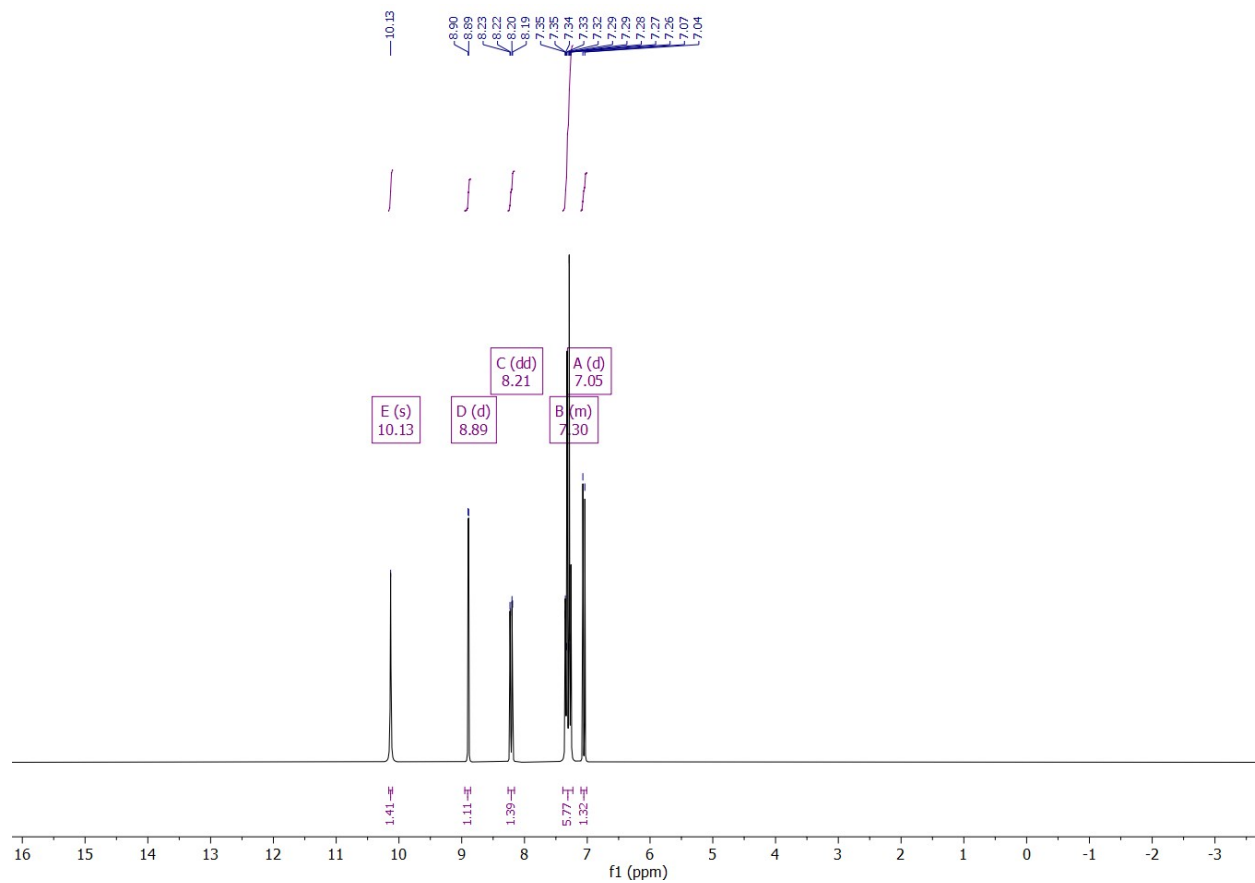

Figure S 35 <sup>1</sup>H-NMR Spectra 2,4-dinitro-N-(p-tolyl)

## Supporting information

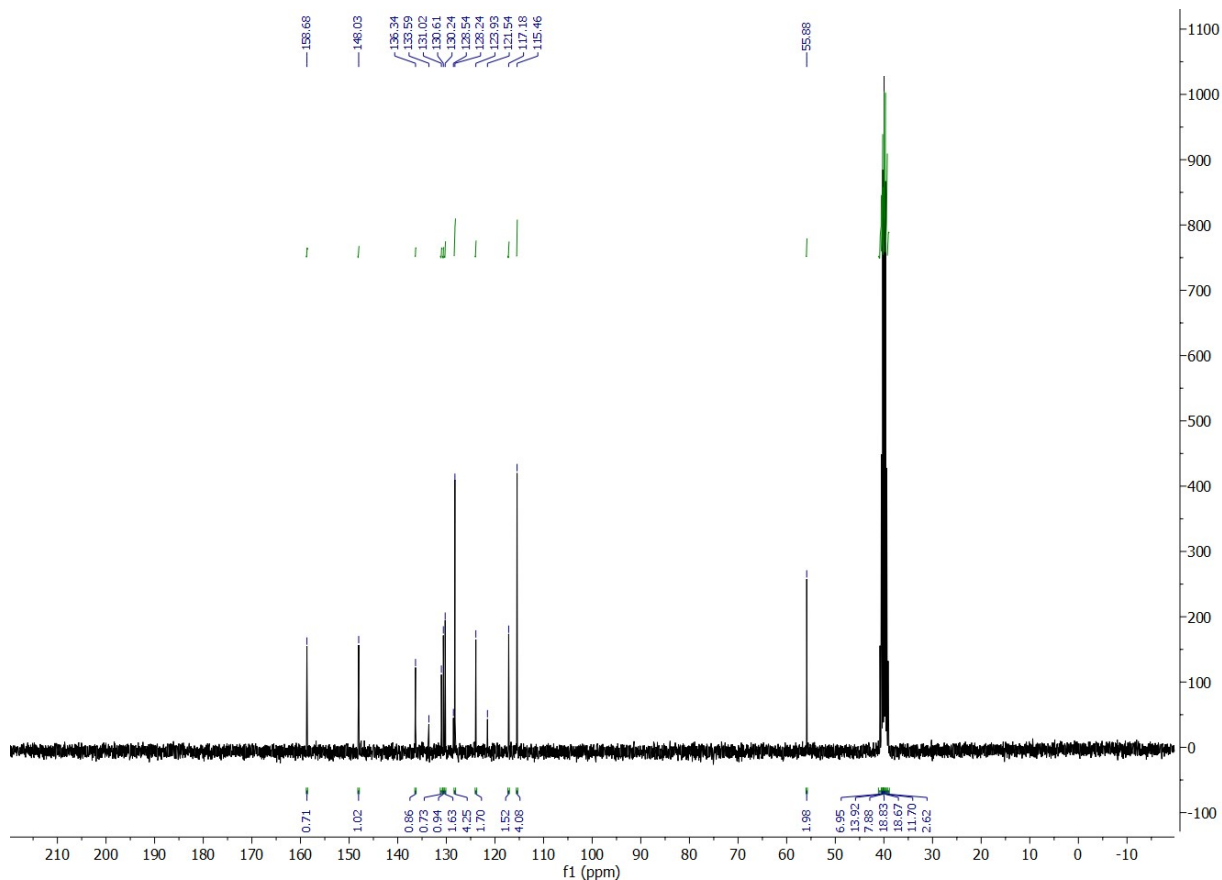

Figure S 36 C-NMR spectra of 2,4-dinitro-N-(p-tolyl)

- Synthesis N-(4-methoxyphenyl)-2,4-dinitroaniline:** 0.25mmol of 4-methoxyaniline was dissolved in the mix of H<sub>2</sub>O and ethanol (2cc / 1:1), after obtaining a uniform solution, 0.3mmol of 2,4-dinitrochlorobenzene was added and allowed them to be uniform. Finally, photocatalyst was added and the mixture was exposed to sunlight. The control of the reaction was carried out by TLC each 15 min. The reaction was carried out for 60 min. The product was filtered and the precipitate was washed with ethyl acetate. Then the liquid was kept under the hood to evaporate the solvent. Before full evaporation, the obtained precipitate was filtered again by filter paper and recrystallized by ethyl acetate and then it was dried at the room temperature M.P: 143-145°C : Ft-IR : 3329, 3309, 1619, 1593, 1512, 1336, 1247, 9278, 833; MS m/z: 289.25; <sup>1</sup>H NMR (301 MHz, DMSO) δ 10.12 (s, 1H), 8.89 (d, *J* = 2.7 Hz, 1H), 8.20 (dd, *J* = 9.6, 2.8 Hz, 2H), 7.36 – 7.28 (m, 3H), 7.13 – 7.04 (m, 3H), 3.82 (s, 1H). <sup>13</sup>C NMR (76 MHz, DMSO) δ 146.8 (C8), 131.4 (C11), 130.2 (C6), 130.1 (C9), 129.7 (C12), 128.5 (C3), 128.0 (C1,5), 121.5 (C10), 117.5 (C13), 116.0 (C2,4), 14.5 (C21).

## Supporting information

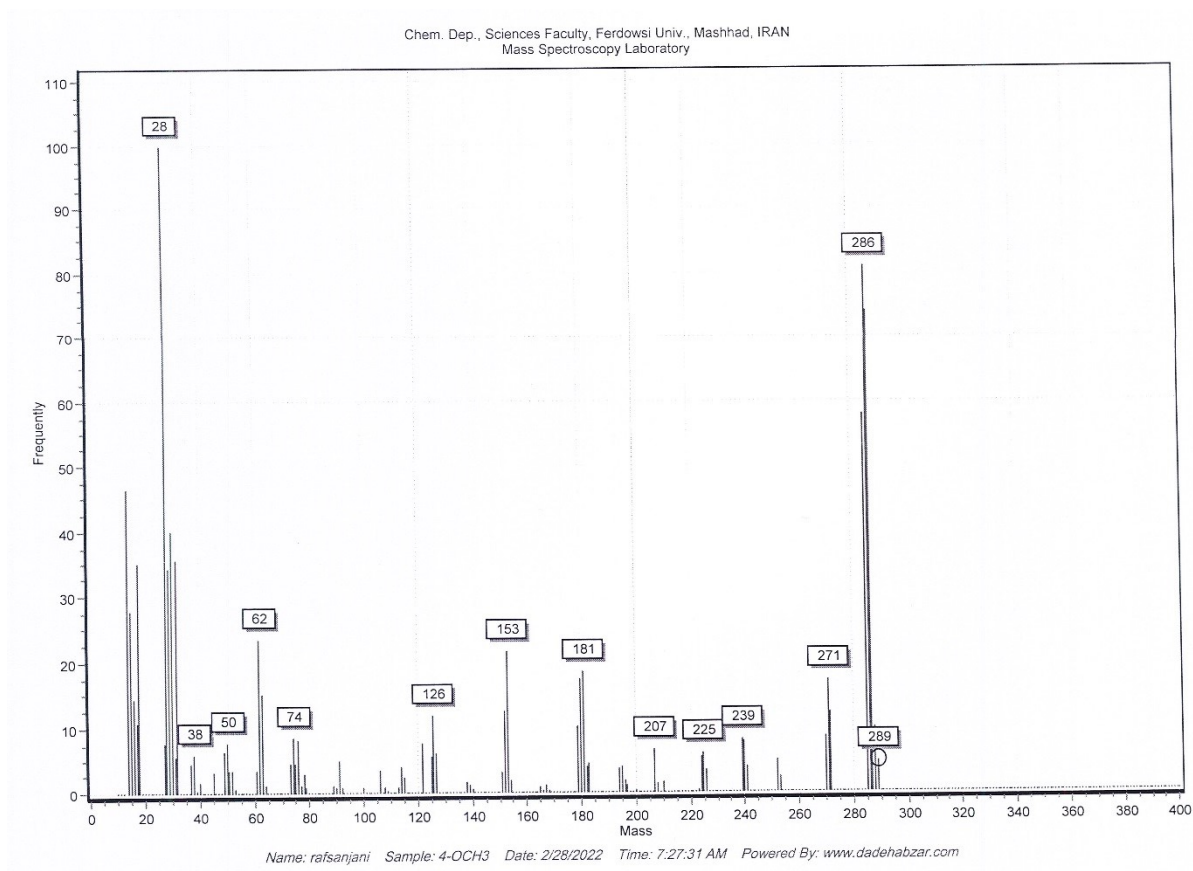

Figure S 37 Mass Spectroscopy of *N*-(4-methoxyphenyl)-2,4-dinitroaniline

## Supporting information

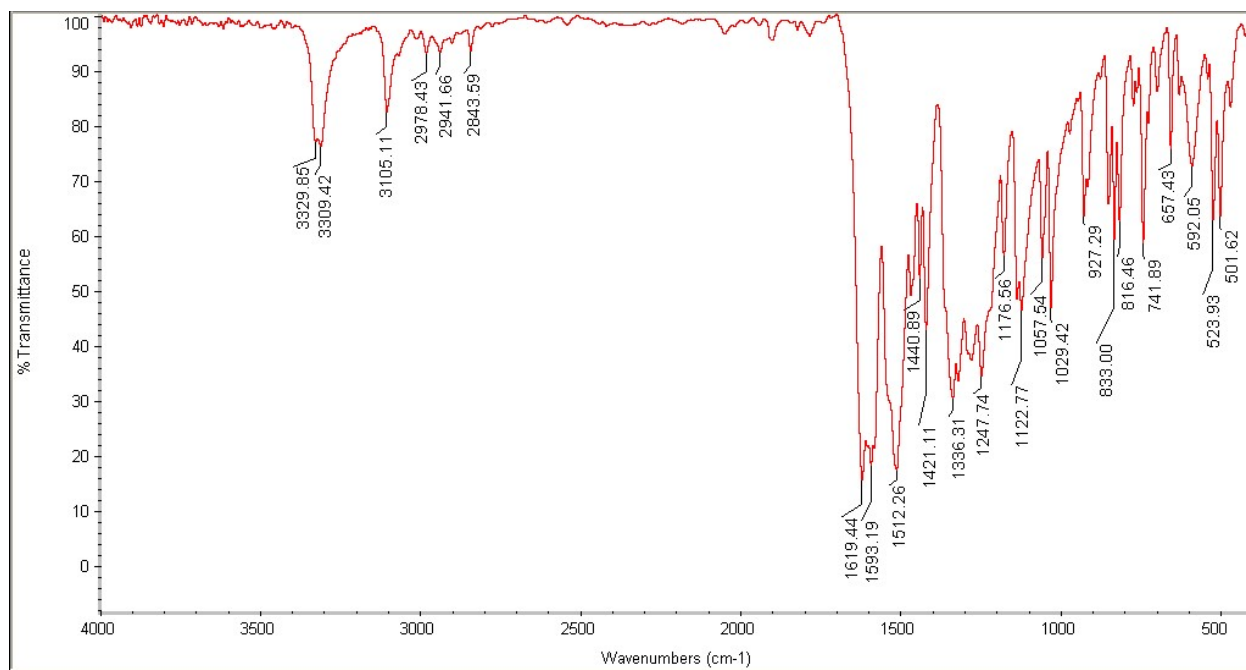

Figure S 38 FT-IR Spectroscopy of *N*-(4-methoxyphenyl)-2,4-dinitroaniline

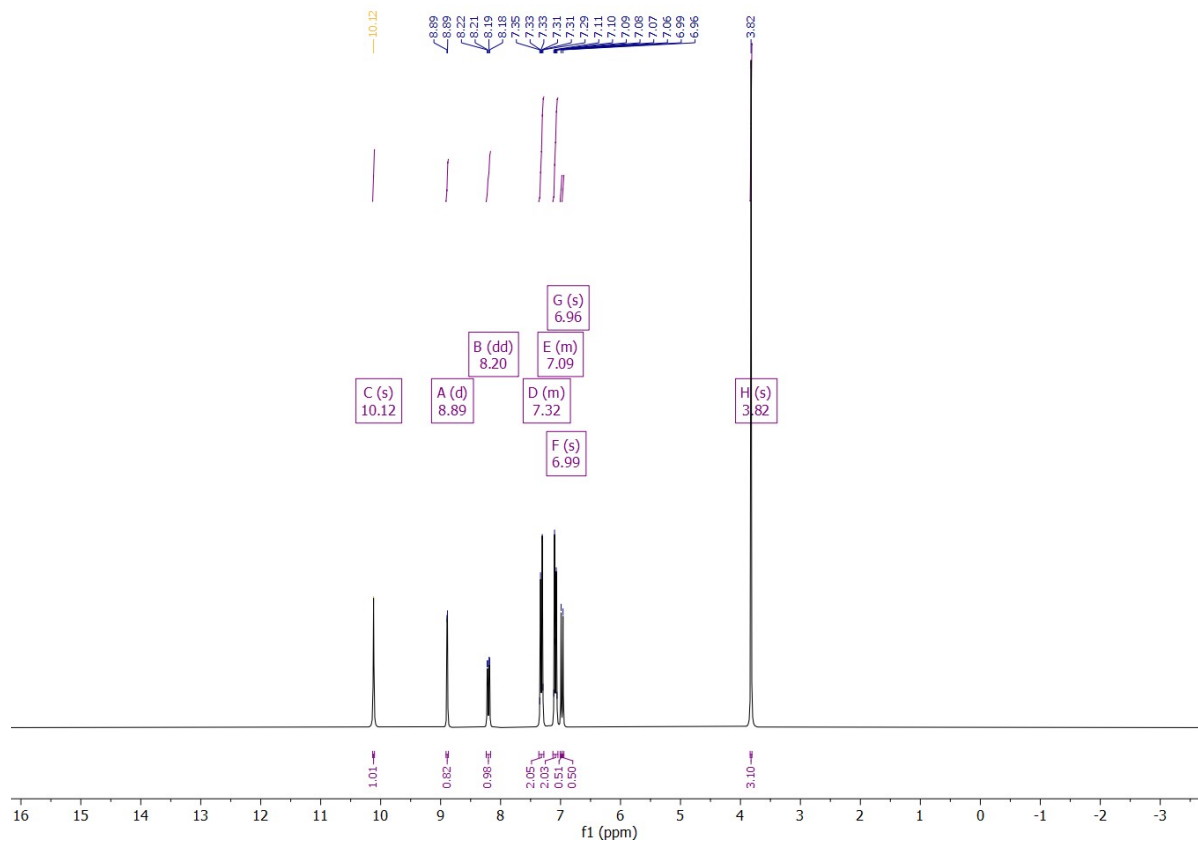

Figure S 39 <sup>1</sup>H-NMR Spectra of *N*-(4-methoxyphenyl)-2,4-dinitroaniline

## Supporting information

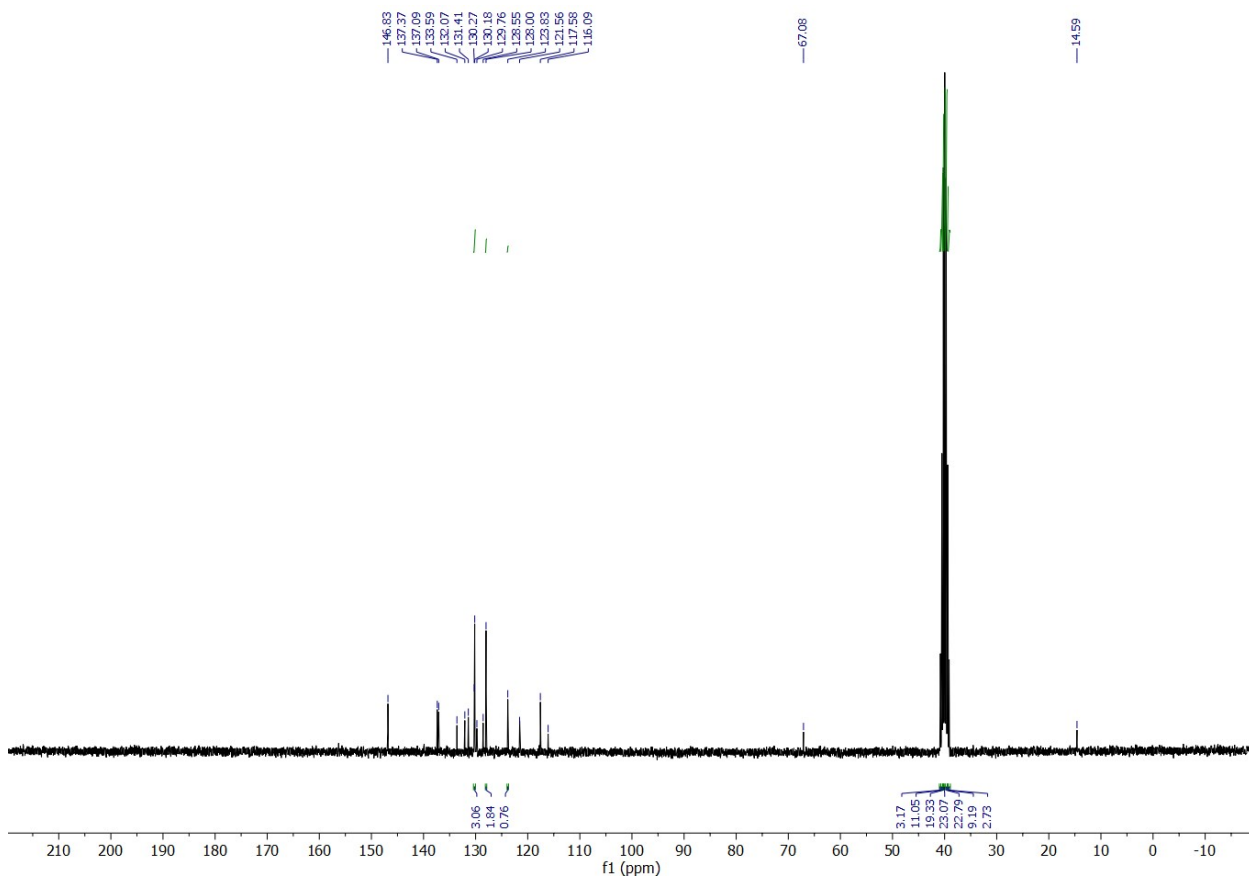

Figure S 40  $^{13}\text{C}$ -NMR spectra of *N*-(4-methoxyphenyl)-2,4-dinitroaniline

- Synthesis N-(4-chlorophenyl)-2,4-dinitroaniline:** 0.25mmol of 4-chloroaniline was dissolved in the mix of  $\text{H}_2\text{O}$  and ethanol (2cc / 1:1), after obtaining a uniform solution, 0.3mmol of 2,4-dinitrochlorobenzene was added and allowed them to be uniform. Finally, photocatalyst was added and the mixture was exposed to sunlight. The control of the reaction was carried out by TLC each 15 min. The reaction was carried out for 60 min. The product was filtered and the precipitate was washed with ethyl acetate. Then the liquid was kept under the hood to evaporate the solvent. Before full evaporation, the obtained precipitate was filtered again by filter paper and recrystallized by ethyl acetate and then it was dried at the room temperature .M.P: 166-169 $^{\circ}\text{C}$ ; Ft-IR : 1619, 1608, 1519, 1341, 1286, 1141, 918, 833, 741; MS m/z :293.66;  $^1\text{H}$  NMR (301 MHz, DMSO)  $\delta$  10.15 (s, 1H), 8.90 (d,  $J$  = 2.8 Hz, 1H), 8.53 (dd,  $J$  = 8.9, 2.7 Hz, 2H), 8.22 (d,  $J$  = 2.8 Hz, 1H), 7.64 – 7.53 (m, 3H), 7.44 (d,  $J$  = 8.7 Hz, 1H).  $^{13}\text{C}$  NMR (76 MHz, DMSO)  $\delta$  146.8 (C8), 137.3 (C6), 131.4 (C11), 130.2 (C9), 130.1 (C2,4), 129.7 (C12), 128.5 (C3), 128.0 (C1,5), 121.5 (C10), 116.1 (C13).



## Supporting information

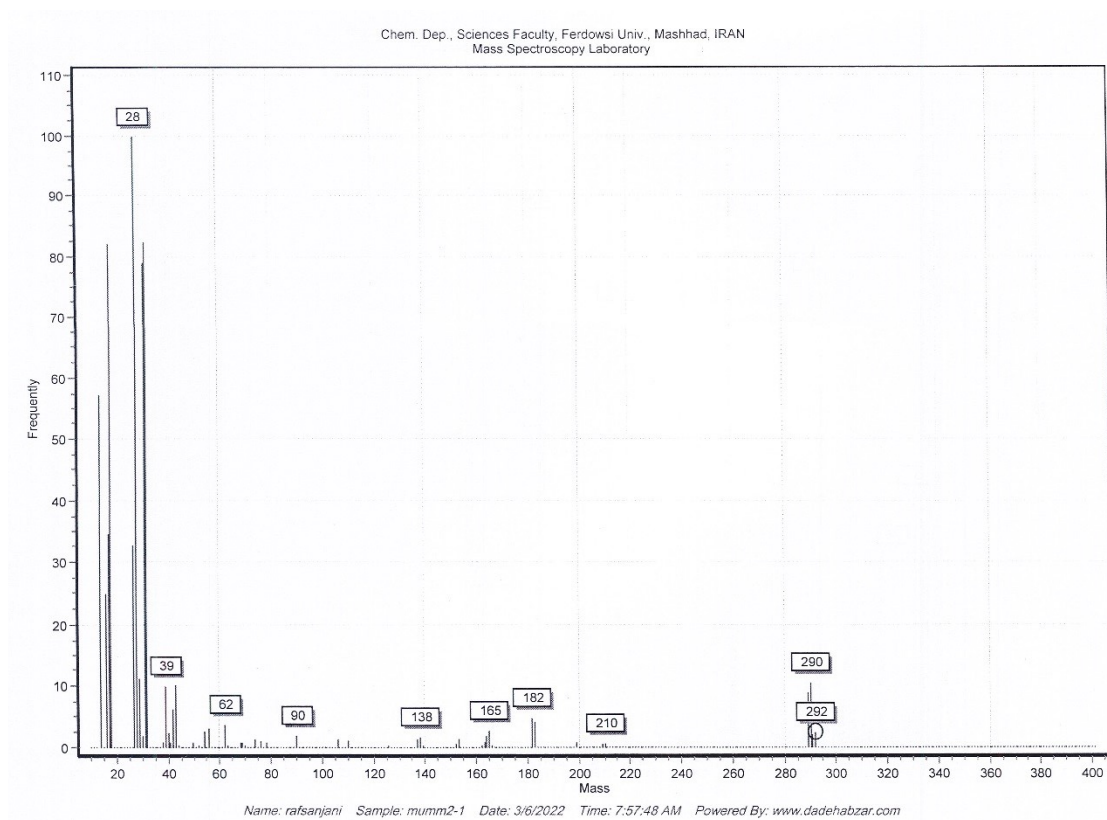

Figure S 41 Mass Spectroscopy of *N*-(4-chlorophenyl)-2,4-dinitroaniline

## Supporting information

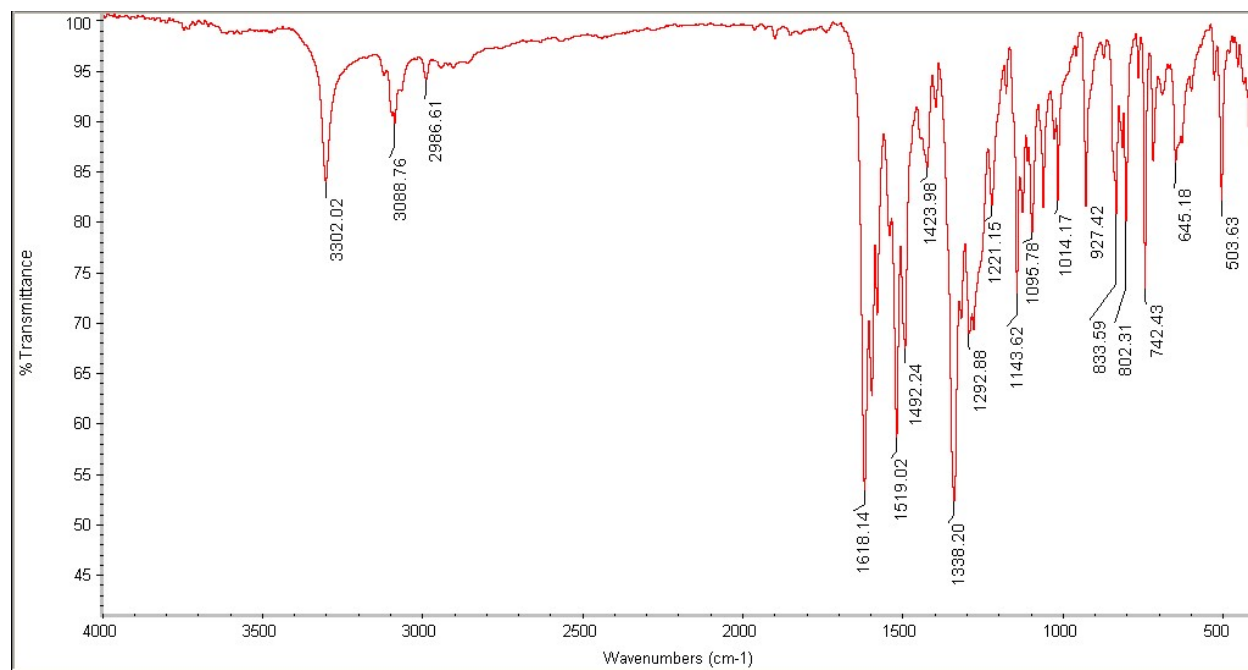

Figure S 42 FT-IR spectra of *N*-(4-chlorophenyl)-2,4-dinitroaniline

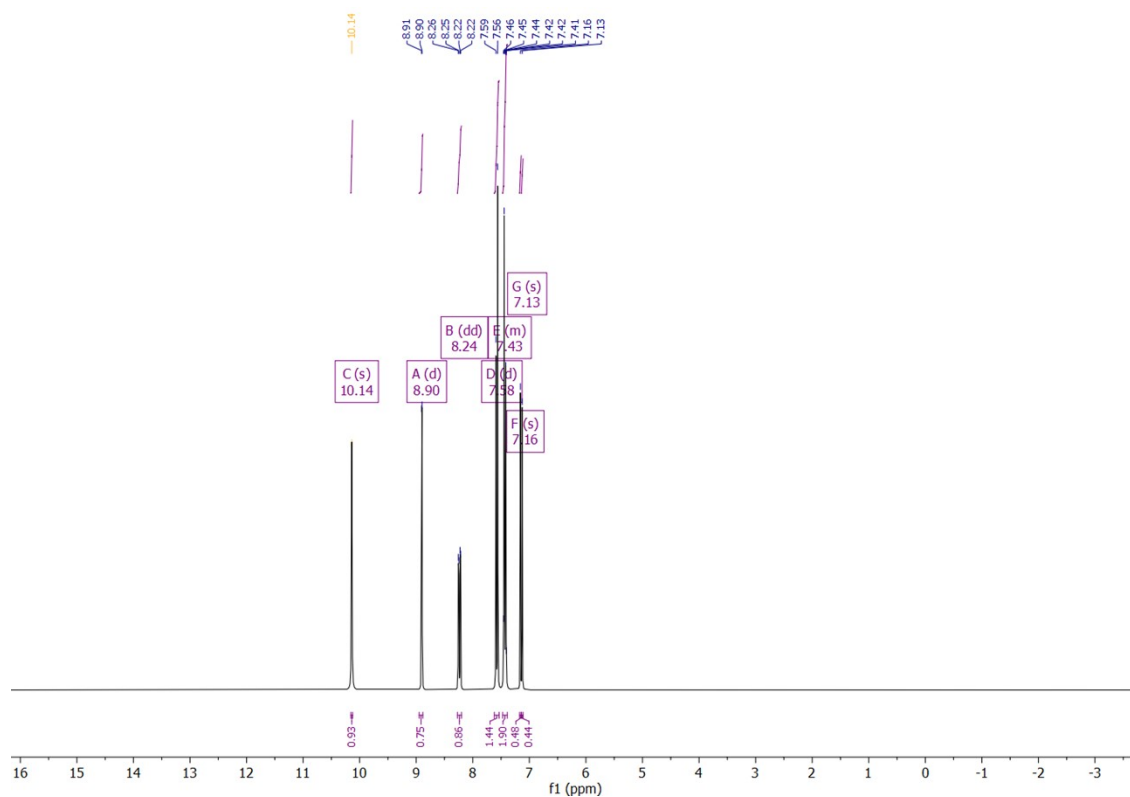

Figure S 43 <sup>1</sup>H-NMR Spectra of *N*-(4-chlorophenyl)-2,4-dinitroaniline

## Supporting information

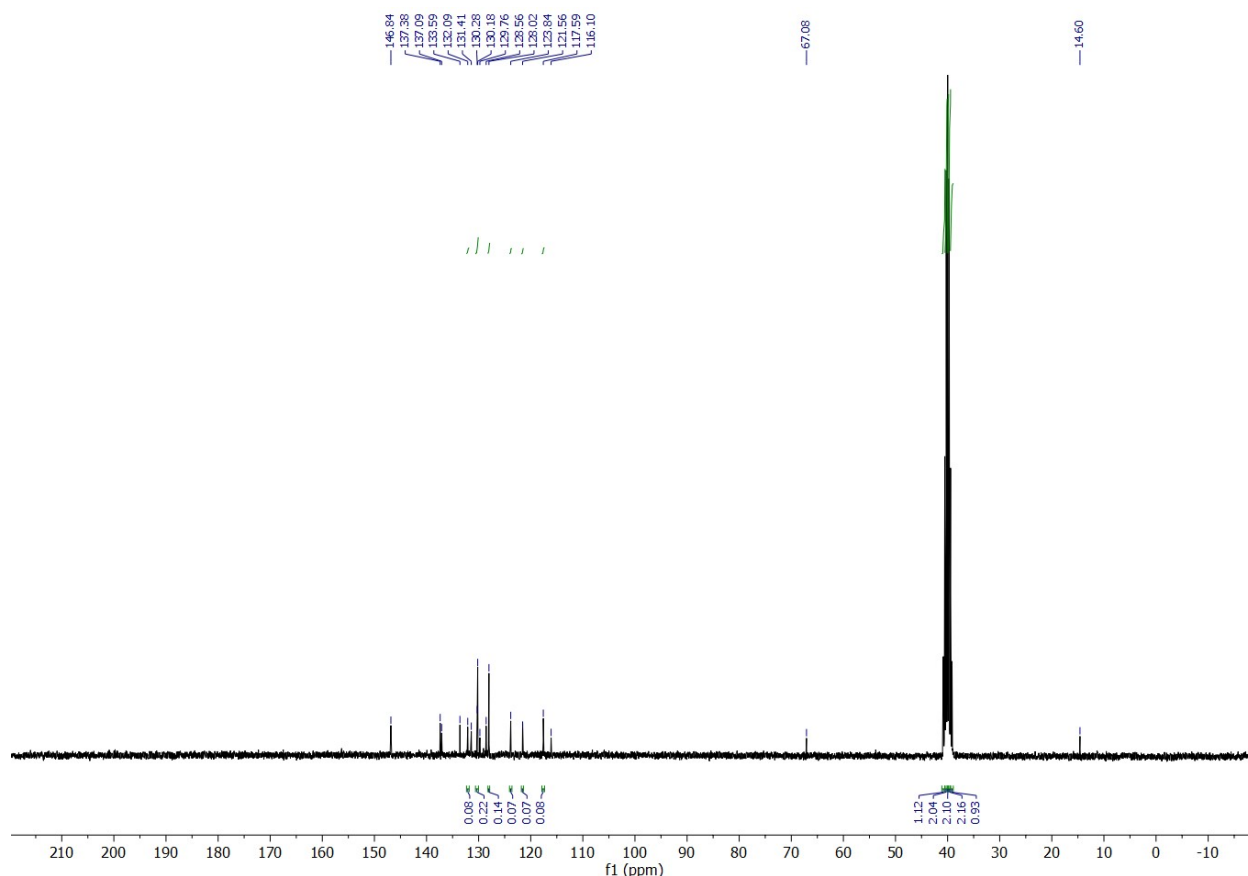

Figure S 44  $^{13}\text{C}$ -NMR Spectra of *N*-(4-chlorophenyl)-2,4-dinitroaniline

- Synthesis *N*-(3-chlorophenyl)-2,4-dinitroaniline** : 0.25mmol of 3-chloroaniline was dissolved in the mix of  $\text{H}_2\text{O}$  and ethanol (2cc / 1:1), after obtaining a uniform solution, 0.3mmol of 2,4-dinitrochlorobenzene was added and allowed them to be uniform. Finally, photocatalyst was added and the mixture was exposed to sunlight. The control of the reaction was carried out by TLC each 15 min. The reaction was carried out for 60 min. The product was filtered and the precipitate was washed with ethyl acetate. Then the liquid was kept under the hood to evaporate the solvent. Before full evaporation, the obtained precipitate was filtered again by filter paper and recrystallized by ethyl acetate and then it was dried at the room temperature M.P: 182-183°C; Ft-IR : 1618, 1519, 1492, 1338, 1292, 1143, 927, 802, 742; MS  $m/z$  :293.66;  $^1\text{H}$  NMR (301 MHz, DMSO)  $\delta$  10.13 (s, 1H), 8.91 (dd,  $J = 9.3, 2.7$  Hz, 2H), 8.52 (d,  $J = 8.9, 2.7$  Hz, 1H), 8.26 (dd,  $J = 9.5, 2.8$  Hz, 2H), 7.58 – 7.49 (m, 2H), 7.46 – 7.35 (m, 2H).  $^{13}\text{C}$  NMR (76 MHz, DMSO)  $\delta$  138.4 (C6), 136.4 (C8), 135.8 (C4), 131.2 (C9), 131.1 (C11), 130.2 (C12), 128.5 (C2), 127.3 (C5), 123.7 (C3), 121.5 (C10), 117.3 (C1,13).

## Supporting information

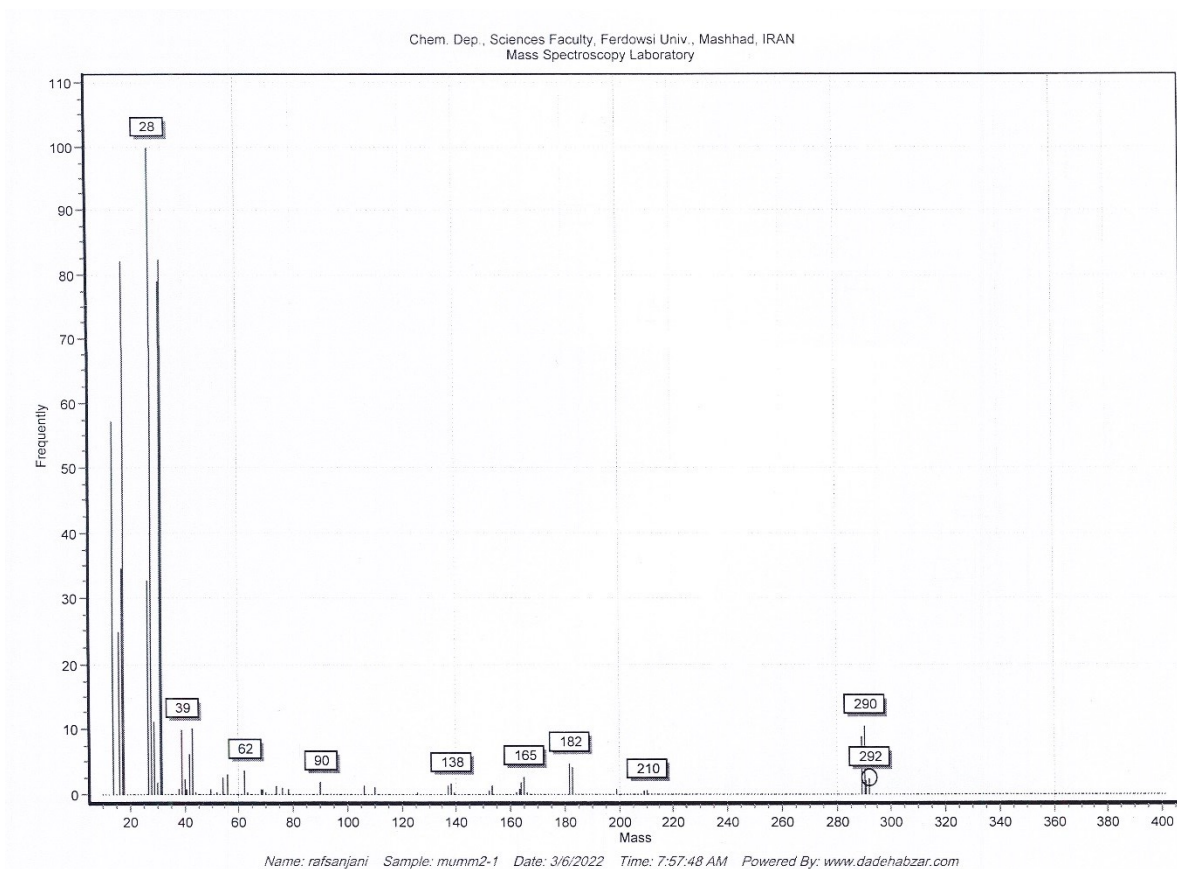

Figure S 45 Mass Spectroscopy of *N*-(3-chlorophenyl)-2,4-dinitroaniline

## Supporting information

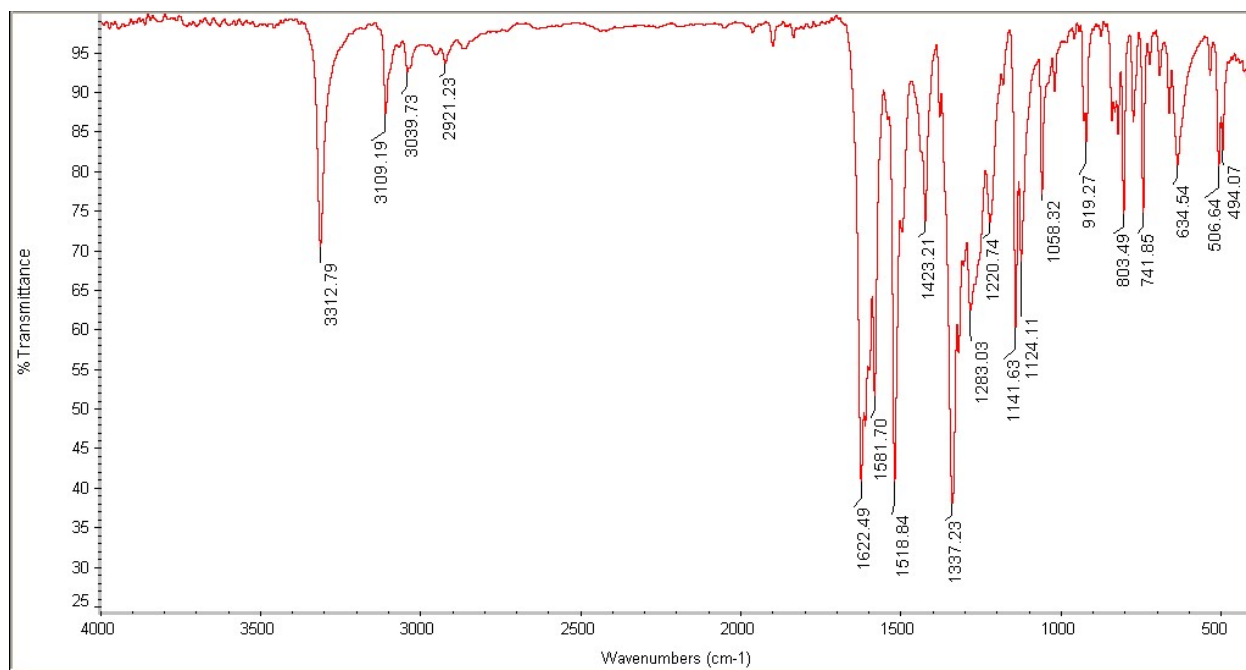

Figure S 46 FT-IR Spectra of *N*-(3-chlorophenyl)-2,4-dinitroaniline

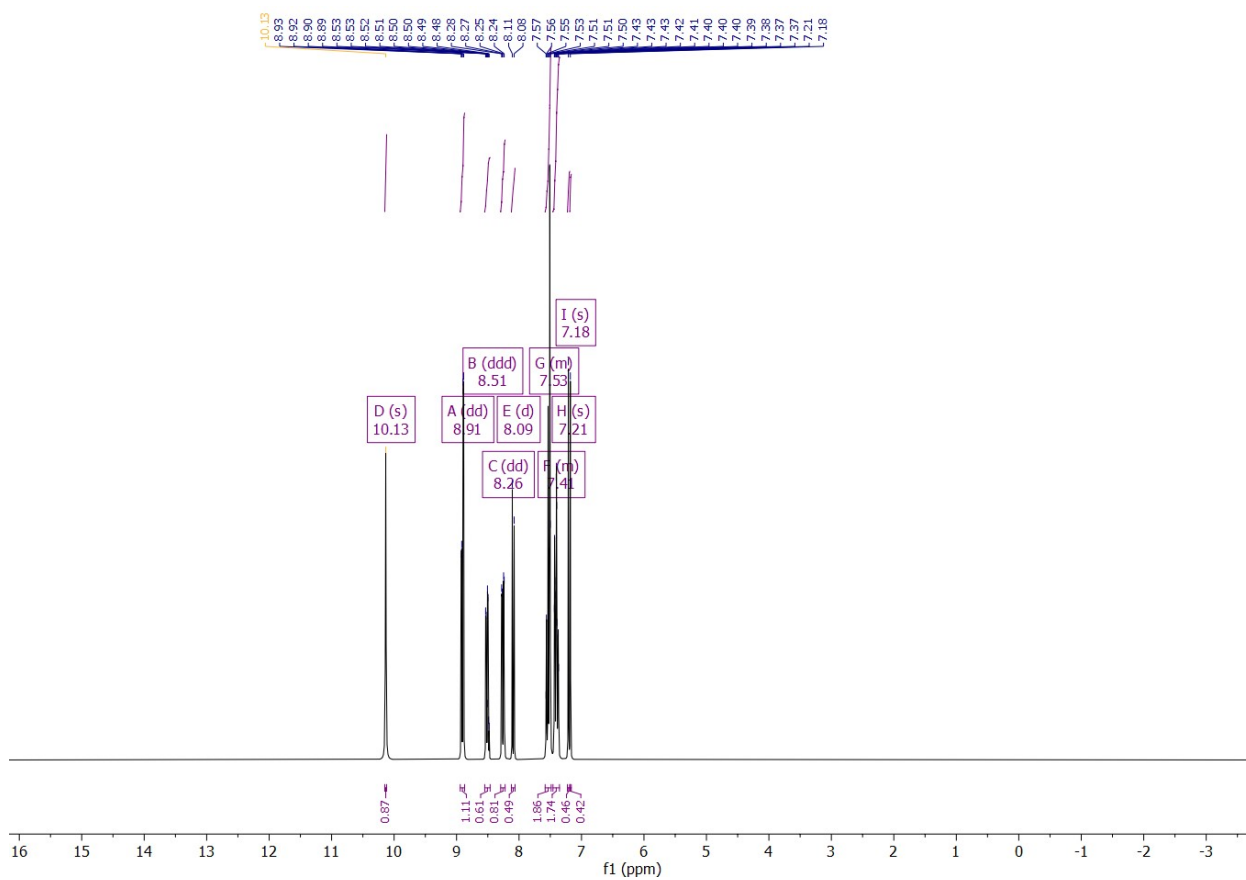

Figure S 47 <sup>1</sup>H-NMR Spectra of *N*-(3-chlorophenyl)-2,4-dinitroaniline

## Supporting information

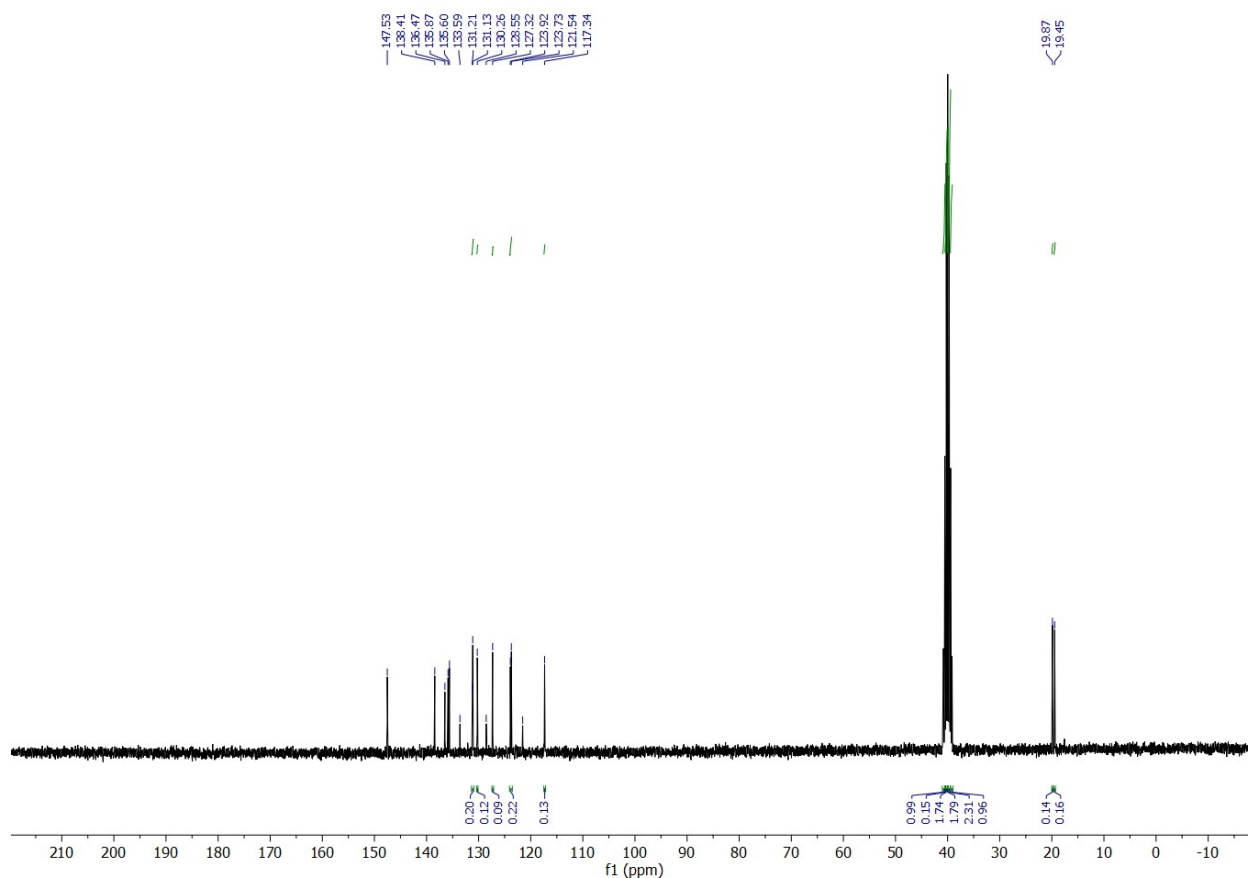

Figure S 48 C-NMR Spectra of N-(3-chlorophenyl)-2,4-dinitroaniline

- (1) Rafsanjani Dehghazi, M.; Absalan, Y.; Gholizadeh, M.; Razavi, M.; Souri, K. Noble-Free Nanophotocatalyst of  $Ti_xFe_yLa_mO_z$  for Efficient Photocatalytic C–N Cross-Coupling Reactions under Visible Light. *ACS Appl. Nano Mater.* **2023**, *6* (2), 1106–1118. <https://doi.org/10.1021/acsanm.2c04617>.
